# Supplementary material for: RNAseq based transcriptomics study of SMCs from carotid atherosclerotic plaque: BMP2 and IDs proteins are crucial regulators of plaque stability
Source: PubMed Central journal article supplement (PMC5471186; doi:10.1038/s41598-017-03687-9), 2017-06-14
Supplement: 41598_2017_3687_MOESM1_ESM.pdf [file 41598_2017_3687_MOESM1_ESM.pdf]

## Supplementary Information

**RNAseq based transcriptomics study of SMCs from carotid atherosclerotic plaque:**

**BMP2 and IDs proteins are crucial regulators of plaque stability**

Iraide Alloza<sup>1,2,3\*</sup>, Haize Goikuria<sup>1,3</sup>, Juan Luis Idro<sup>4</sup>, Juan Carlos Triviño<sup>5</sup>, José María Fernandez Velasco<sup>4</sup>, Elena Elizagaray<sup>6</sup>, M<sup>a</sup> García Barcina<sup>7</sup>, Genoveva Montoya<sup>8</sup>, Esther Sarasola<sup>7</sup>, Reyes Vega<sup>9</sup>, M<sup>a</sup> del Mar Freijo<sup>4</sup>, Koen Vandembroeck<sup>1,2,3</sup>

### **Affiliation(s):**

<sup>1</sup>Neurogenomiks, Neuroscience Department, Faculty of Medicine and Odontology, Basque Country University, Leioa, Spain.

<sup>2</sup>IKERBASQUE, Basque Foundation for Science, Bilbao, Spain.

<sup>3</sup>ACHUCARRO, Basque Centre for Neuroscience, Zamudio, Spain.

<sup>4</sup>Neurology Unit, Basurto University Hospital, Bilbao, Spain.

<sup>5</sup>Sistemas Genómicos, Valencia, Spain.

<sup>6</sup>Radiodiagnostic Unit, Basurto University Hospital, Bilbao, Spain.

<sup>7</sup>Clinical genetics Unit, Basurto University Hospital, Bilbao, Spain.

<sup>8</sup>Department of Methods and Experimental Psychology, Faculty of Psychology and Education, Deusto University, Bilbao, Spain.

<sup>9</sup>Vascular surgery and angiology, Basurto University Hospital, Bilbao, Spain.

\*Corresponding author: Iraide Alloza PhD, Neurogenomiks Group, Neuroscience Department, Faculty of Medicine and Odontology, University of Basque Country (UPV/EHU), Edif 205, floor -1, Bizkaia Technological Park, 48170 Zamudio (Bizkaia), Spain, email: [iraide.alloza@ehu.es](mailto:iraide.alloza@ehu.es), phone: +34 946018292, fax: +34 946018289

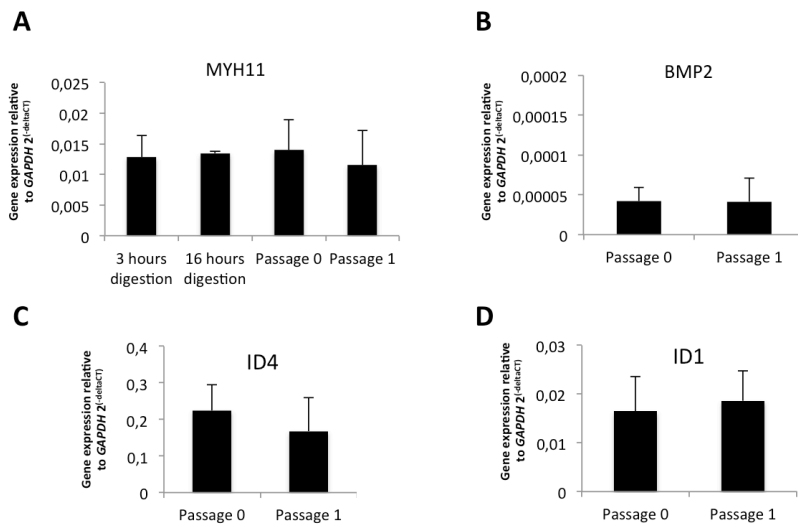

**Supplementary Figure S1.** (A) Differential gene expression analysis of *MYH11* in SMCs isolated after 3 and 16 hours of collagenase digestion and in SMCs from passage 0 and 1. (B) Differential gene expression of *BMP2* in passage 0 vs passage 1. (C) Differential gene expression of *ID4* in passage 0 vs passage 1. (D) Differential gene expression of *ID1* in SMCs from passage 0 and passage 1. GAPDH was used as housekeeping gene for normalization. Figure shows a representative analysis of gene expression levels in two different SCMs samples in each condition with 4 performed replicates to illustrate quality control (MYH11).

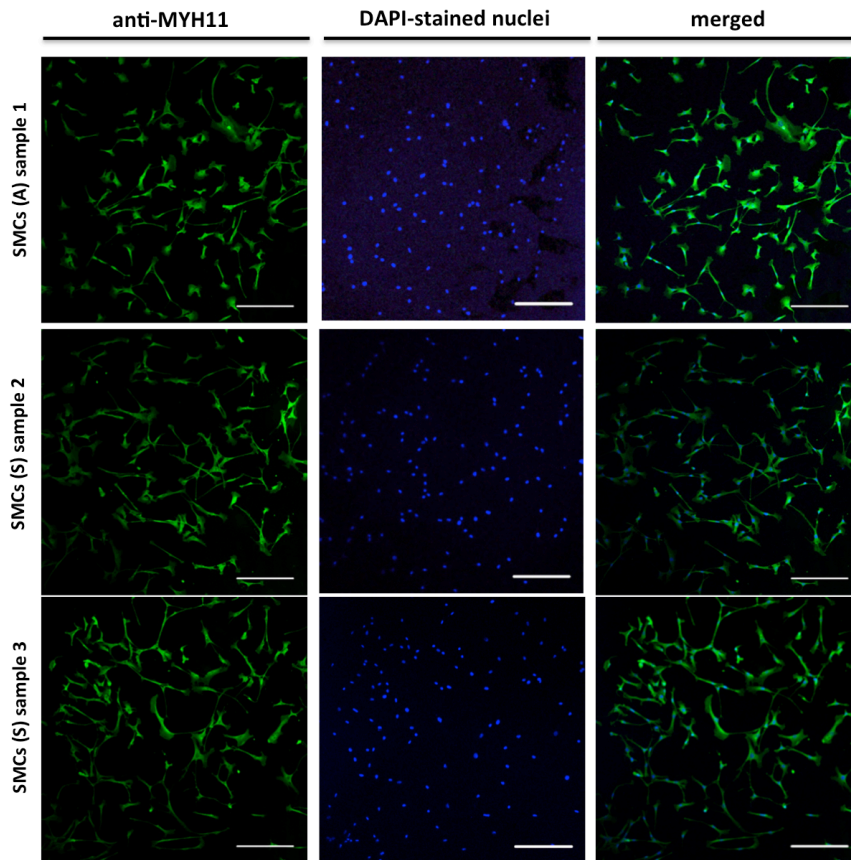

**Supplementary Figure S2. Immunolocalization of MYH11 in primary carotid SMCs.** Confocal immunostaining of 3 different cultures of SMCs as representative examples. Panels on the left show immunostaining of MYH11, central panels show DAPI-stained nuclei and right panels show immunostaining merged with DAPI staining. Magnification: the horizontal bars represent a scale of 250  $\mu\text{m}$ .

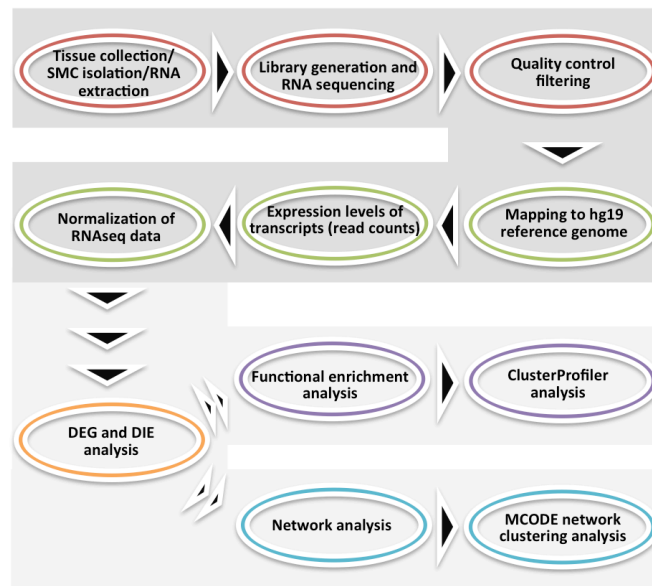

**Supplementary Figure S3. Flowchart for the design of the RNAseq transcriptomics analysis to identify gene expression differences between SMCs from A and S carotid plaques.**

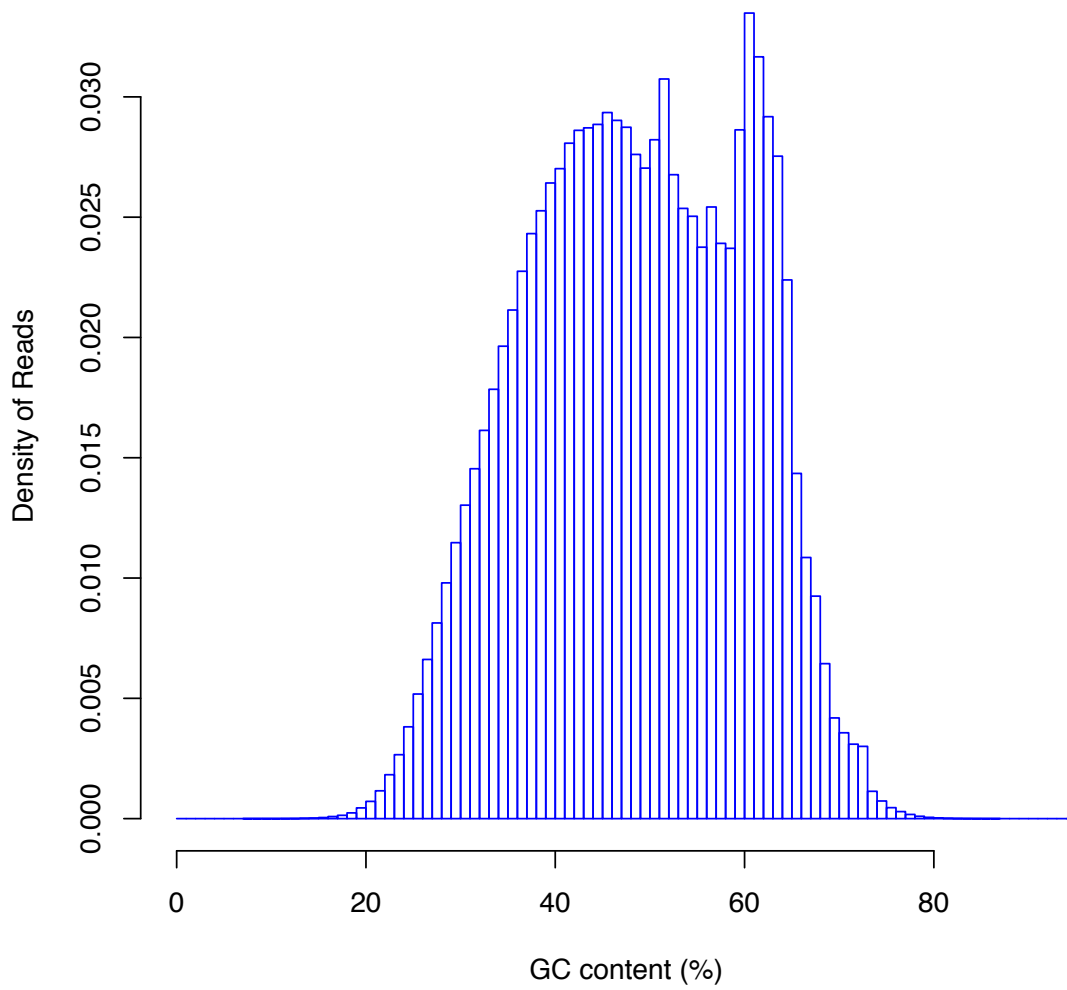

**Supplementary Figure S4. Distribution of GC content.** All the samples followed a normal distribution of GC content, expected to be between 45-55 %.

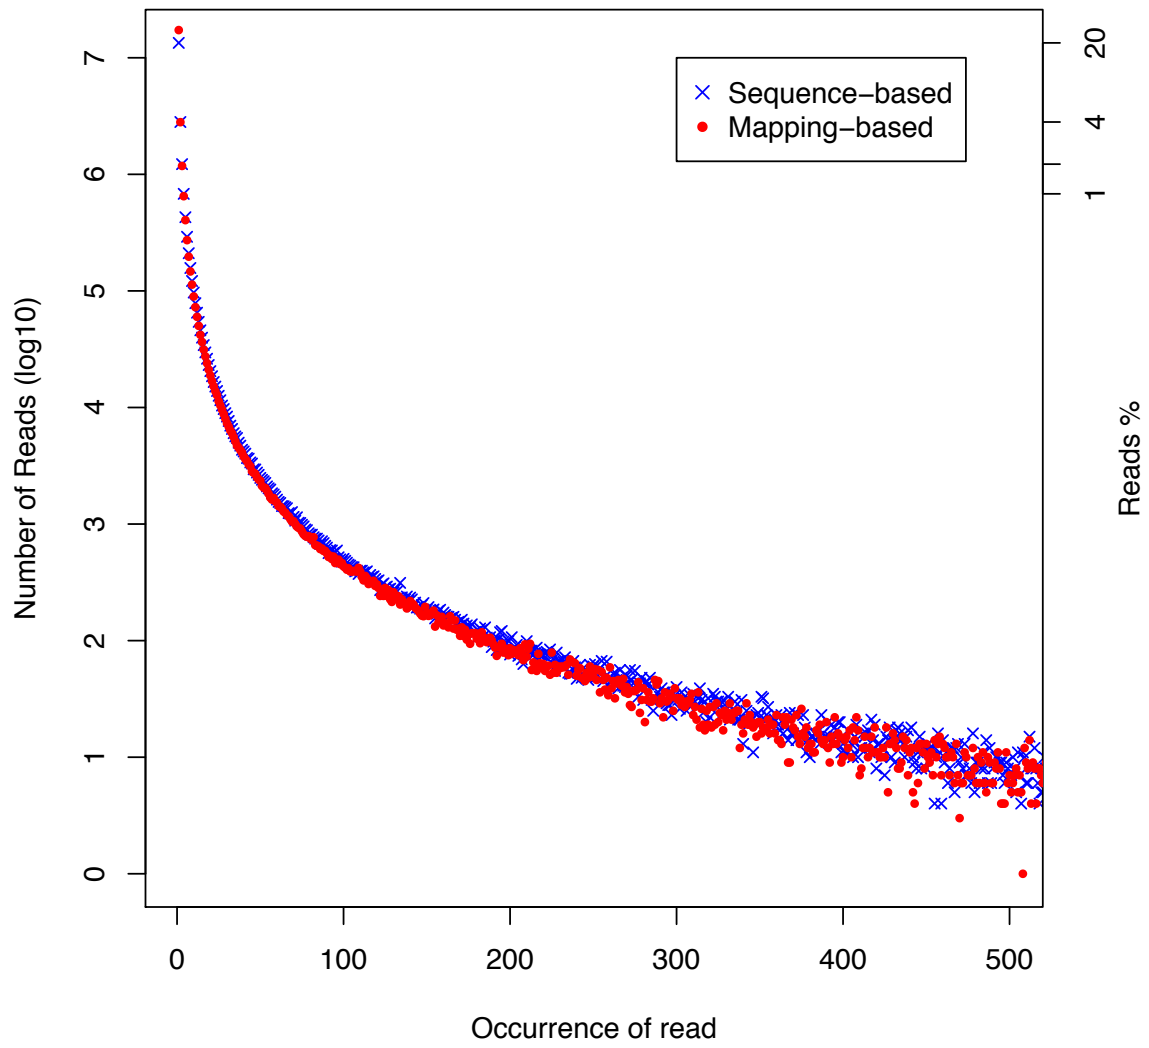

**Supplementary Figure S5. Distribution of duplicates.** Only a very small fraction of reads showed a small number of duplicates.

**A**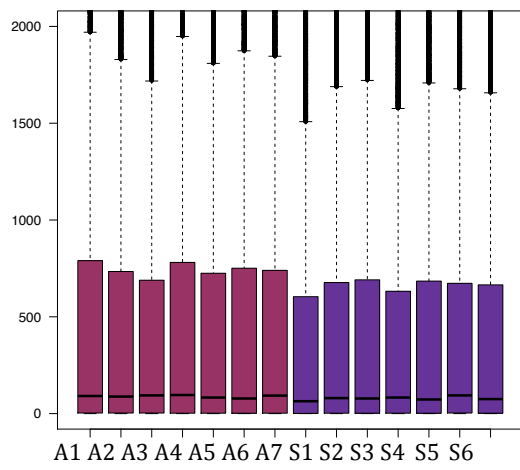**B**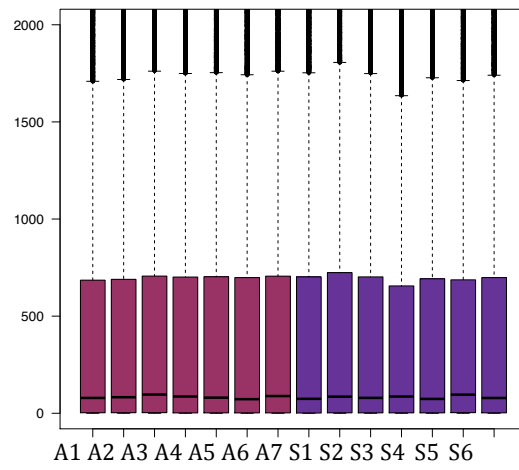

**Supplementary Figure S6. (A, B) Normalization by DESeq2.** Distribution of gene quantification before normalization (A) and after normalization (B).

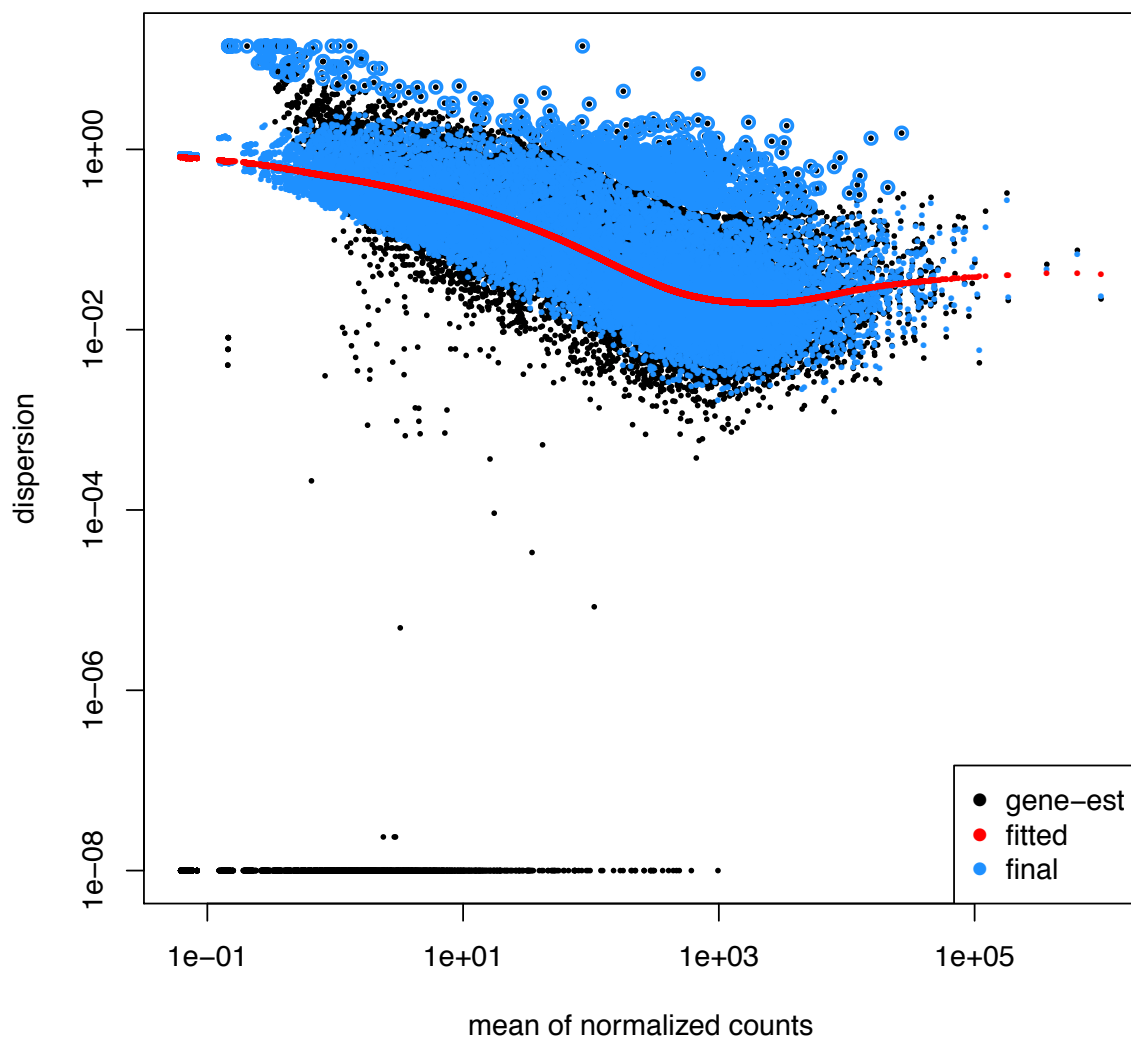

**Supplementary Figure S7. Dispersion adjustment plot.** The dispersion adjustment plot displays the gene-wise estimate (black), the fitted values representing the relationship between the dispersion and the normalized counts (red), the final estimates (blue) and the dispersion outliers values with high gene-wise dispersion, which were not adjusted (blue-circle).



A

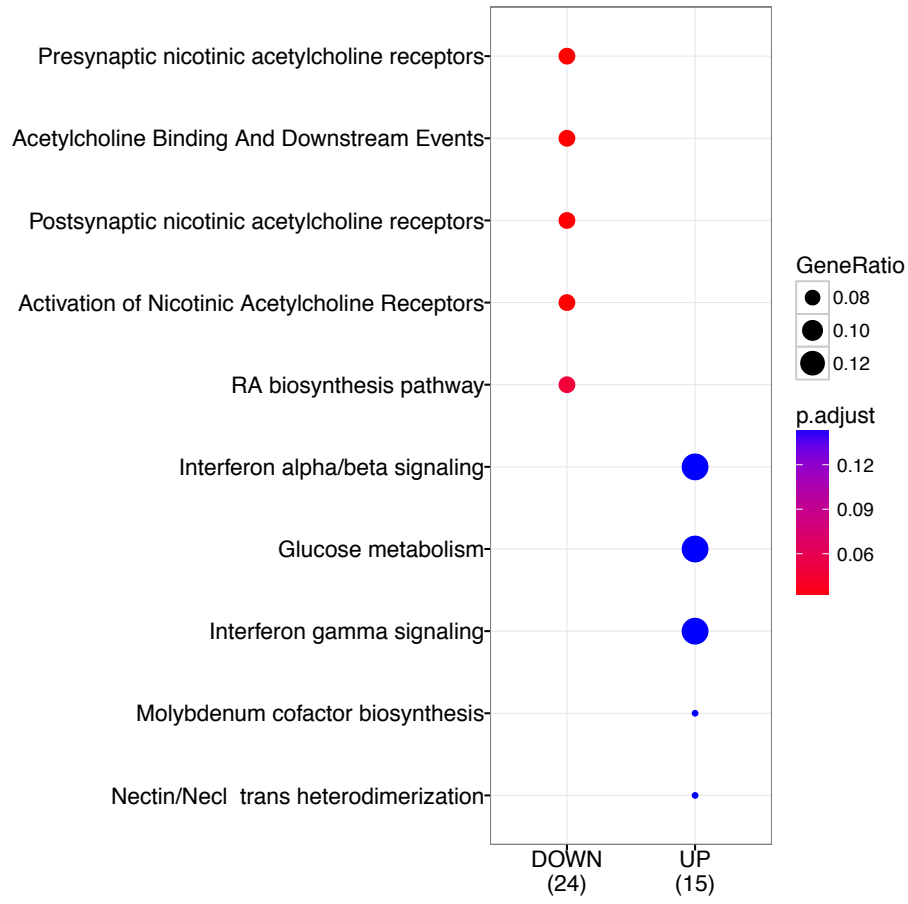

**B**

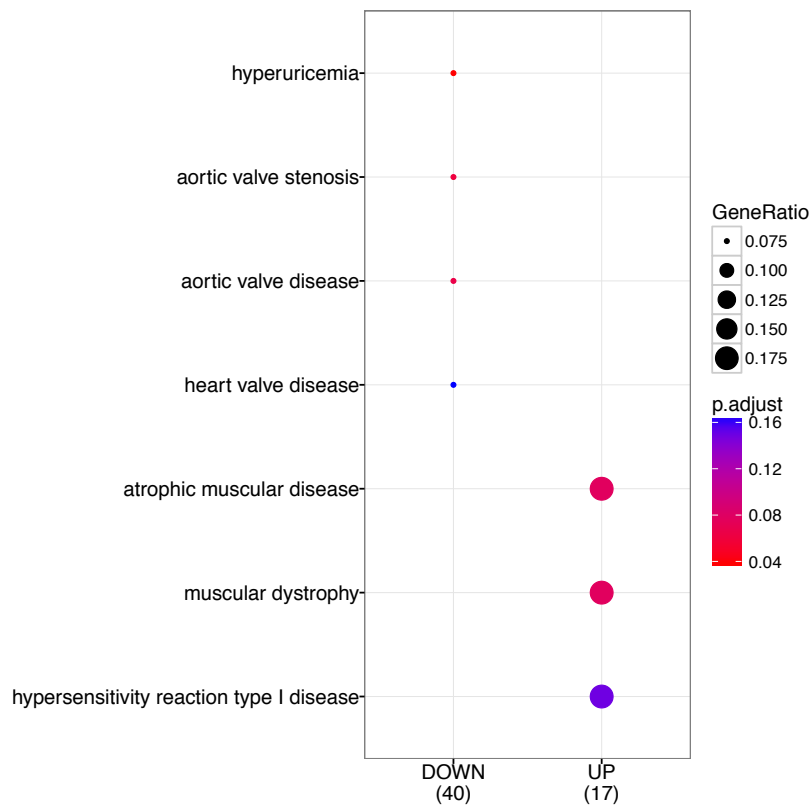

**Supplementary Figure S8. Comparative study between under-expressed and over-**

**expressed genes using ClusterProfiler method. (A) Comparative analysis based on**

Reactome. (B) Comparative analysis based on Disease Ontology. GeneRatio is the number of

genes from a specific category. Enrichment term is represented by coloured dots (red

indicates high enrichment and blue indicates low enrichment).

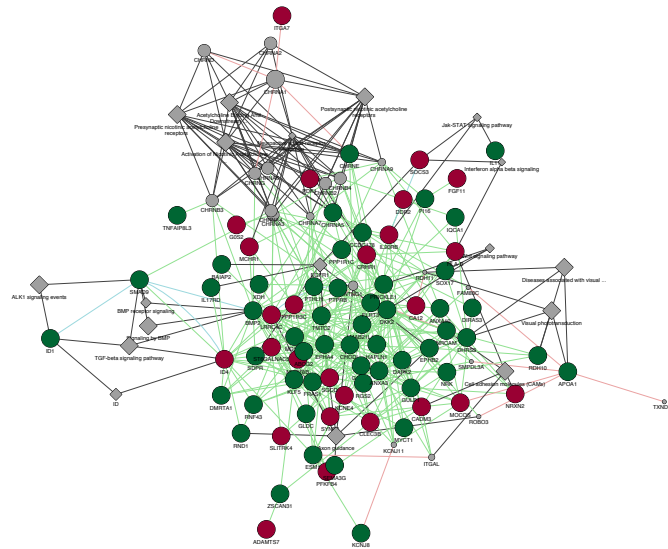

**Supplementary Figure S9. GeneMANIA Network diagram.** Red and green circles are query genes identified as upregulated and downregulated between S and A respectively in by RNAseq. Grey circles are extra genes connected by prediction. Rhomboid represent protein domains. Green lines represent genetic interactions. Blue lines represents pathway database

analysis. Grey lines represent gene-pathway associations. Pink lines represent physical interactions database analysis.

| <b>Gene ID</b>  | <b>Symbol</b> | <b>FC</b> | <b><i>P</i><sub>adj</sub></b> |
|-----------------|---------------|-----------|-------------------------------|
| ENSG00000165507 | C10orf10      | 1,94      | 0,0006                        |
| ENSG00000152049 | KCNE4         | 1,87      | 0,003                         |
| ENSG00000117069 | ST6GALNAC5    | 1,83      | 0,009                         |
| ENSG00000135424 | ITGA7         | 1,81      | 0,005                         |
| ENSG00000128285 | MCHR1         | 1,76      | 0,02                          |
| ENSG00000174564 | IL20RB        | 1,75      | 0,02                          |
| ENSG00000163815 | CLEC3B        | 1,75      | 0,02                          |
| ENSG00000075643 | MOCOS         | 1,75      | 0,001                         |
| ENSG00000074410 | CA12          | 1,72      | 0,0006                        |
| ENSG00000174807 | CD248         | 1,71      | 0,03                          |
| ENSG00000133454 | MYO18B        | 1,70      | 0,04                          |
| ENSG00000179542 | SLITRK4       | 1,65      | 0,06*                         |
| ENSG00000161570 | CCL5          | 1,65      | 0,06*                         |
| ENSG00000148948 | LRRC4C        | 1,65      | 0,06*                         |
| ENSG00000117289 | TXNIP         | 1,64      | 0,04                          |
| ENSG00000123689 | G0S2          | 1,63      | 0,05                          |
| ENSG00000162706 | CADM3         | 1,63      | 0,07*                         |
| ENSG00000120088 | CRHR1         | 1,62      | 0,07*                         |
| ENSG00000184557 | SOCS3         | 1,61      | 0,03                          |
| ENSG00000176438 | SYNE3         | 1,60      | 0,05                          |
| ENSG00000161958 | FGF11         | 1,60      | 0,04                          |
| ENSG00000234745 | HLA-B         | 1,59      | 0,06*                         |
| ENSG00000164236 | ANKRD33B      | 1,59      | 0,09*                         |
| ENSG00000170624 | SGCD          | 1,57      | 0,08*                         |
| ENSG00000259649 | RP11-351M8.1  | 1,57      | 0,09*                         |
| ENSG00000172201 | ID4           | 1,55      | 0,09*                         |
| ENSG00000119938 | PPP1R3C       | 1,54      | 0,09*                         |
| ENSG00000114268 | PFKFB4        | 1,54      | 0,04                          |
| ENSG00000110076 | NRXN2         | 1,53      | 0,05                          |
| ENSG00000136378 | ADAMTS7       | 1,52      | 0,02                          |
| ENSG00000152256 | PDK1          | 1,52      | 0,03                          |
| ENSG00000112837 | TBX18         | 1,51      | 0,09*                         |
| ENSG00000162733 | DDR2          | 1,50      | 0,02                          |
| ENSG00000179348 | GATA2         | -1,51     | 0,09*                         |
| ENSG00000120693 | SMAD9         | -1,52     | 0,05                          |
| ENSG00000164736 | SOX17         | -1,52     | 0,09*                         |

|                 |           |       |       |
|-----------------|-----------|-------|-------|
| ENSG00000035664 | DAPK2     | -1,53 | 0,09* |
| ENSG00000144730 | IL17RD    | -1,54 | 0,01  |
| ENSG00000133216 | EPHB2     | -1,55 | 0,03  |
| ENSG00000166960 | CCDC178   | -1,55 | 0,09* |
| ENSG00000120279 | MYCT1     | -1,57 | 0,05  |
| ENSG00000121039 | RDH10     | -1,57 | 0,06* |
| ENSG00000183578 | TNFAIP8L3 | -1,58 | 0,09* |
| ENSG00000145681 | HAPLN1    | -1,58 | 0,09* |
| ENSG00000158125 | XDH       | -1,59 | 0,09* |
| ENSG00000139174 | PRICKLE1  | -1,59 | 0,08* |
| ENSG00000182368 | FAM27A    | -1,59 | 0,09* |
| ENSG00000118137 | APOA1     | -1,60 | 0,07* |
| ENSG00000169684 | CHRNA5    | -1,60 | 0,09* |
| ENSG00000167644 | C19orf33  | -1,61 | 0,06* |
| ENSG00000116106 | EPHA4     | -1,61 | 0,05  |
| ENSG00000125968 | ID1       | -1,61 | 0,04  |
| ENSG00000123572 | NRK       | -1,61 | 0,09* |
| ENSG00000121361 | KCNJ8     | -1,63 | 0,07* |
| ENSG00000091129 | NRCAM     | -1,63 | 0,07* |
| ENSG00000175746 | C15orf54  | -1,64 | 0,05  |
| ENSG00000172602 | RND1      | -1,64 | 0,04  |
| ENSG00000095752 | IL11      | -1,64 | 0,07* |
| ENSG00000175866 | BAIAP2    | -1,65 | 0,01  |
| ENSG00000127329 | PTPRB     | -1,65 | 0,06* |
| ENSG00000144366 | GULP1     | -1,66 | 0,005 |
| ENSG00000143140 | GJA5      | -1,66 | 0,04  |
| ENSG00000176399 | DMRTA1    | -1,68 | 0,05  |
| ENSG00000168497 | SDPR      | -1,68 | 0,02  |
| ENSG00000010319 | SEMA3G    | -1,69 | 0,02  |
| ENSG00000254656 | RTL1      | -1,69 | 0,03  |
| ENSG00000178445 | GLDC      | -1,69 | 0,02  |
| ENSG00000162496 | DHRS3     | -1,70 | 0,04  |
| ENSG00000102554 | KLF5      | -1,70 | 0,003 |
| ENSG00000172159 | FRMD3     | -1,70 | 0,04  |
| ENSG00000164283 | ESM1      | -1,71 | 0,03  |
| ENSG00000235109 | ZSCAN31   | -1,72 | 0,01  |
| ENSG00000132321 | IQCA1     | -1,72 | 0,02  |
| ENSG00000008394 | MGST1     | -1,72 | 0,002 |
| ENSG00000164530 | PI16      | -1,73 | 0,01  |
| ENSG00000150722 | PPP1R1C   | -1,73 | 0,03  |
| ENSG00000116741 | RGS2      | -1,74 | 0,02  |
| ENSG00000180660 | MAB21L1   | -1,76 | 0,02  |
| ENSG00000155011 | DKK2      | -1,77 | 0,01  |
| ENSG00000126950 | TMEM35    | -1,81 | 0,02  |
| ENSG00000179104 | TMTC2     | -1,81 | 0,004 |
| ENSG00000118777 | ABCG2     | -1,85 | 0,01  |
| ENSG00000125848 | FLRT3     | -1,87 | 0,007 |
| ENSG00000108375 | RNF43     | -1,90 | 0,003 |

|                 |        |       |          |
|-----------------|--------|-------|----------|
| ENSG00000125845 | BMP2   | -1,90 | 0,005    |
| ENSG00000138759 | FRAS1  | -1,90 | 0,005    |
| ENSG00000108556 | CHRNE  | -1,91 | 0,005    |
| ENSG00000163273 | NPPC   | -1,93 | 0,003    |
| ENSG00000162595 | DIRAS3 | -1,93 | 0,003    |
| ENSG00000109511 | ANXA10 | -1,93 | 0,003    |
| ENSG00000154645 | CHODL  | -2,16 | 0,0003   |
| ENSG00000138772 | ANXA3  | -2,23 | 0,0001   |
| ENSG00000087494 | PTHLH  | -2,50 | 1,04E-07 |

**Supplementary Table S1. Differential gene expression between S and A. Fold Change**

(FC) valued is obtained by DeSeq2 method and p adjusted value ( $P_{adj}$ ) was calculated using the False Discovery Rate (FDR) method. Significant  $P_{adj}$  value was considered  $P_{adj} \leq 0.05$ .

\*Genes showing a trend towards significance but without reaching it ( $P_{adj} \leq 0.09$ )

| Isoform id      | Gene id         | Symbol     | FC    | P value  | $P_{adj}$ |
|-----------------|-----------------|------------|-------|----------|-----------|
| ENST00000358321 | ENSG00000099994 | SUSD2      | 11,61 | 5,00E-05 | 0,01      |
| ENST00000260227 | ENSG00000137673 | MMP7       | 9,25  | 5,00E-05 | 0,01      |
| ENST00000506608 | ENSG00000185149 | NPY2R      | 8,39  | 0,0002   | 0,04      |
| ENST00000264613 | ENSG00000047457 | CP         | 7,90  | 0,0002   | 0,04      |
| ENST00000374975 | ENSG00000198502 | HLA-DRB5   | 5,72  | 5,00E-05 | 0,01      |
| ENST00000477717 | ENSG00000117069 | ST6GALNAC5 | 4,84  | 5,00E-05 | 0,01      |
| ENST00000075322 | ENSG00000136960 | ENPP2      | 4,59  | 5,00E-05 | 0,01      |
| ENST00000296130 | ENSG00000163815 | CLEC3B     | 4,37  | 5,00E-05 | 0,01      |
| ENST00000394887 | ENSG00000196616 | ADH1B      | 4,07  | 5,00E-05 | 0,01      |
| ENST00000259486 | ENSG00000136960 | ENPP2      | 3,88  | 5,00E-05 | 0,01      |
| ENST00000013222 | ENSG00000241644 | INMT       | 3,84  | 5,00E-05 | 0,01      |
| ENST00000393078 | ENSG00000196136 | SERPINA3   | 3,57  | 5,00E-05 | 0,01      |
| ENST00000368125 | ENSG00000162706 | CADM3      | 3,53  | 0,00015  | 0,03      |
| ENST00000296506 | ENSG00000164106 | SCRG1      | 3,43  | 5,00E-05 | 0,01      |
| ENST00000256861 | ENSG00000123243 | ITIH5      | 3,42  | 0,00015  | 0,03      |
| ENST00000294728 | ENSG00000162692 | VCAM1      | 3,38  | 5,00E-05 | 0,01      |
| ENST00000274938 | ENSG00000146197 | SCUBE3     | 3,30  | 5,00E-05 | 0,01      |
| ENST00000167586 | ENSG00000186847 | KRT14      | 3,06  | 5,00E-05 | 0,01      |
| ENST00000374737 | ENSG00000155659 | VSIG4      | 3     | 0,00015  | 0,03      |
| ENST00000372330 | ENSG00000100985 | MMP9       | 2,82  | 5,00E-05 | 0,01      |
| ENST00000447544 | ENSG00000135218 | CD36       | 2,65  | 5,00E-05 | 0,01      |
| ENST00000298295 | ENSG00000165507 | C10orf10   | 2,50  | 5,00E-05 | 0,01      |
| ENST00000604125 | ENSG00000152049 | KCNE4      | 2,48  | 5,00E-05 | 0,01      |
| ENST00000542220 | ENSG00000159403 | C1R        | 2,42  | 5,00E-05 | 0,01      |
| ENST00000553804 | ENSG00000135424 | ITGA7      | 2,38  | 5,00E-05 | 0,01      |
| ENST00000367662 | ENSG00000116183 | PAPPA2     | 2,34  | 0,00015  | 0,03      |
| ENST00000006053 | ENSG00000006210 | CX3CL1     | 2,29  | 5,00E-05 | 0,01      |

|                 |                 |          |       |          |      |
|-----------------|-----------------|----------|-------|----------|------|
| ENST00000361673 | ENSG00000198796 | ALPK2    | 2,20  | 5,00E-05 | 0,01 |
| ENST00000437043 | ENSG00000164308 | ERAP2    | 2,18  | 0,0001   | 0,02 |
| ENST00000339732 | ENSG00000131386 | GALNT15  | 2,15  | 0,0002   | 0,04 |
| ENST00000284322 | ENSG00000154175 | ABI3BP   | 2,12  | 5,00E-05 | 0,01 |
| ENST00000261799 | ENSG00000113721 | PDGFRB   | 2,10  | 5,00E-05 | 0,01 |
| ENST00000369317 | ENSG00000117289 | TXNIP    | 2,07  | 5,00E-05 | 0,01 |
| ENST00000435422 | ENSG00000170624 | SGCD     | 2,06  | 5,00E-05 | 0,01 |
| ENST00000345517 | ENSG00000163017 | ACTG2    | 2     | 0,00015  | 0,03 |
| ENST00000257435 | ENSG00000134986 | NREP     | 1,99  | 5,00E-05 | 0,01 |
| ENST00000429713 | ENSG00000172403 | SYNPO2   | 1,99  | 5,00E-05 | 0,01 |
| ENST00000412585 | ENSG00000234745 | HLA-B    | 1,98  | 5,00E-05 | 0,01 |
| ENST00000307365 | ENSG00000168209 | DDIT4    | 1,96  | 5,00E-05 | 0,01 |
| ENST00000261326 | ENSG00000075643 | MOCOS    | 1,95  | 5,00E-05 | 0,01 |
| ENST00000178638 | ENSG00000074410 | CA12     | 1,94  | 5,00E-05 | 0,01 |
| ENST00000254722 | ENSG00000132386 | SERPINF1 | 1,93  | 5,00E-05 | 0,01 |
| ENST00000335174 | ENSG00000186352 | ANKRD37  | 1,90  | 0,0002   | 0,04 |
| ENST00000378700 | ENSG00000172201 | ID4      | 1,89  | 5,00E-05 | 0,01 |
| ENST00000294507 | ENSG00000162511 | LPTM5    | 1,89  | 5,00E-05 | 0,01 |
| ENST00000540010 | ENSG00000056558 | TRAF1    | 1,89  | 5,00E-05 | 0,01 |
| ENST00000330871 | ENSG00000184557 | SOCS3    | 1,88  | 5,00E-05 | 0,01 |
| ENST00000344366 | ENSG00000074410 | CA12     | 1,87  | 5,00E-05 | 0,01 |
| ENST00000238994 | ENSG00000119938 | PPP1R3C  | 1,86  | 5,00E-05 | 0,01 |
| ENST00000217233 | ENSG00000101255 | TRIB3    | 1,84  | 5,00E-05 | 0,01 |
| ENST00000327299 | ENSG00000162433 | AK4      | 1,83  | 0,0002   | 0,04 |
| ENST00000328916 | ENSG00000182326 | C1S      | 1,79  | 0,0001   | 0,02 |
| ENST00000323076 | ENSG00000136167 | LCP1     | 1,76  | 5,00E-05 | 0,01 |
| ENST00000157600 | ENSG00000071282 | LMCD1    | 1,75  | 0,0001   | 0,02 |
| ENST00000297848 | ENSG00000187955 | COL14A1  | 1,73  | 5,00E-05 | 0,01 |
| ENST00000369663 | ENSG00000112837 | TBX18    | 1,73  | 5,00E-05 | 0,01 |
| ENST00000367288 | ENSG00000163431 | LMOD1    | 1,72  | 5,00E-05 | 0,01 |
| ENST00000338981 | ENSG00000114374 | USP9Y    | 1,70  | 5,00E-05 | 0,01 |
| ENST00000566620 | ENSG00000140945 | CDH13    | 1,68  | 5,00E-05 | 0,01 |
| ENST00000394308 | ENSG00000070669 | ASNS     | 1,65  | 0,0001   | 0,02 |
| ENST00000402744 | ENSG00000109472 | CPE      | 1,65  | 5,00E-05 | 0,01 |
| ENST00000367922 | ENSG00000162733 | DDR2     | 1,64  | 5,00E-05 | 0,01 |
| ENST00000220244 | ENSG00000103888 | KIAA1199 | 1,62  | 0,0002   | 0,04 |
| ENST00000380250 | ENSG00000073910 | FRY      | 1,58  | 0,00015  | 0,03 |
| ENST00000409652 | ENSG00000221963 | APOL6    | 1,56  | 0,00015  | 0,03 |
| ENST00000396680 | ENSG00000128272 | ATF4     | 1,55  | 0,00015  | 0,03 |
| ENST00000372764 | ENSG00000122861 | PLAU     | 1,55  | 0,0001   | 0,02 |
| ENST00000375377 | ENSG00000165757 | KIAA1462 | 1,54  | 0,00015  | 0,03 |
| ENST00000263734 | ENSG00000116016 | EPAS1    | 1,53  | 5,00E-05 | 0,01 |
| ENST00000295992 | ENSG00000163710 | PCOLCE2  | 1,53  | 5,00E-05 | 0,01 |
| ENST00000376588 | ENSG00000135069 | PSAT1    | 1,53  | 0,0002   | 0,04 |
| ENST00000274276 | ENSG00000145623 | OSMR     | 1,50  | 0,0002   | 0,04 |
| ENST00000358432 | ENSG00000142627 | EPHA2    | -1,50 | 5,00E-05 | 0,01 |
| ENST00000260630 | ENSG00000138061 | CYP1B1   | -1,53 | 0,00015  | 0,03 |
| ENST00000229416 | ENSG00000001084 | GCLC     | -1,56 | 0,0002   | 0,04 |

|                 |                 |           |       |          |      |
|-----------------|-----------------|-----------|-------|----------|------|
| ENST00000367466 | ENSG00000116711 | PLA2G4A   | -1,56 | 0,0001   | 0,02 |
| ENST00000005257 | ENSG00000006451 | RALA      | -1,56 | 0,0001   | 0,02 |
| ENST00000245185 | ENSG00000125148 | MT2A      | -1,57 | 0,0001   | 0,02 |
| ENST00000361441 | ENSG00000244509 | APOBEC3C  | -1,58 | 0,0001   | 0,02 |
| ENST00000381434 | ENSG00000137033 | IL33      | -1,62 | 0,0001   | 0,02 |
| ENST00000272542 | ENSG00000144136 | SLC20A1   | -1,63 | 5,00E-05 | 0,01 |
| ENST00000371697 | ENSG00000148677 | ANKRD1    | -1,64 | 0,00015  | 0,03 |
| ENST00000248598 | ENSG00000127951 | FGL2      | -1,67 | 5,00E-05 | 0,01 |
| ENST00000315711 | ENSG00000091972 | CD200     | -1,68 | 0,0002   | 0,04 |
| ENST00000222543 | ENSG00000105825 | TFPI2     | -1,69 | 5,00E-05 | 0,01 |
| ENST00000237305 | ENSG00000118515 | SGK1      | -1,72 | 5,00E-05 | 0,01 |
| ENST00000367468 | ENSG00000073756 | PTGS2     | -1,77 | 5,00E-05 | 0,01 |
| ENST00000258888 | ENSG00000136383 | ALPK3     | -1,78 | 5,00E-05 | 0,01 |
| ENST00000426693 | ENSG00000164619 | BMPER     | -1,81 | 0,0002   | 0,04 |
| ENST00000379375 | ENSG00000078401 | EDN1      | -1,86 | 5,00E-05 | 0,01 |
| ENST00000276925 | ENSG00000147883 | CDKN2B    | -1,91 | 5,00E-05 | 0,01 |
| ENST00000377861 | ENSG00000184226 | PCDH9     | -1,91 | 5,00E-05 | 0,01 |
| ENST00000265080 | ENSG00000113319 | RASGRF2   | -1,91 | 5,00E-05 | 0,01 |
| ENST00000377103 | ENSG00000178726 | THBD      | -1,93 | 5,00E-05 | 0,01 |
| ENST00000376112 | ENSG00000125968 | ID1       | -1,99 | 5,00E-05 | 0,01 |
| ENST00000252593 | ENSG00000130303 | BST2      | -2,03 | 5,00E-05 | 0,01 |
| ENST00000396210 | ENSG00000008394 | MGST1     | -2,04 | 5,00E-05 | 0,01 |
| ENST00000330688 | ENSG00000077092 | RARB      | -2,04 | 5,00E-05 | 0,01 |
| ENST00000310613 | ENSG00000173597 | SULT1B1   | -2,09 | 0,0001   | 0,02 |
| ENST00000327536 | ENSG00000183578 | TNFAIP8L3 | -2,09 | 5,00E-05 | 0,01 |
| ENST00000274341 | ENSG00000145681 | HAPLN1    | -2,10 | 5,00E-05 | 0,01 |
| ENST00000304141 | ENSG00000168497 | SDPR      | -2,10 | 5,00E-05 | 0,01 |
| ENST00000262259 | ENSG00000105497 | ZNF175    | -2,15 | 5,00E-05 | 0,01 |
| ENST00000306773 | ENSG00000171246 | NPTX1     | -2,21 | 5,00E-05 | 0,01 |
| ENST00000222482 | ENSG00000128510 | CPA4      | -2,27 | 5,00E-05 | 0,01 |
| ENST00000377474 | ENSG00000178695 | KCTD12    | -2,35 | 5,00E-05 | 0,01 |
| ENST00000321196 | ENSG00000179104 | TMTC2     | -2,35 | 5,00E-05 | 0,01 |
| ENST00000315274 | ENSG00000196611 | MMP1      | -2,40 | 0,00015  | 0,03 |
| ENST00000444842 | ENSG00000082482 | KCNK2     | -2,43 | 5,00E-05 | 0,01 |
| ENST00000286614 | ENSG00000156103 | MMP16     | -2,43 | 5,00E-05 | 0,01 |
| ENST00000376468 | ENSG00000120937 | NPPB      | -2,43 | 5,00E-05 | 0,01 |
| ENST00000235382 | ENSG00000116741 | RGS2      | -2,45 | 5,00E-05 | 0,01 |
| ENST00000546561 | ENSG00000127324 | TSPAN8    | -2,54 | 5,00E-05 | 0,01 |
| ENST00000541194 | ENSG00000128567 | PODXL     | -2,59 | 5,00E-05 | 0,01 |
| ENST00000247829 | ENSG00000127324 | TSPAN8    | -2,59 | 5,00E-05 | 0,01 |
| ENST00000232892 | ENSG00000114771 | AADAC     | -2,69 | 5,00E-05 | 0,01 |
| ENST00000297785 | ENSG00000165092 | ALDH1A1   | -2,72 | 5,00E-05 | 0,01 |
| ENST00000591504 | ENSG00000166510 | CCDC68    | -2,74 | 5,00E-05 | 0,01 |
| ENST00000307407 | ENSG00000169429 | IL8       | -2,82 | 5,00E-05 | 0,01 |
| ENST00000284136 | ENSG00000153993 | SEMA3D    | -2,85 | 5,00E-05 | 0,01 |
| ENST00000537928 | ENSG00000128567 | PODXL     | -2,86 | 0,0002   | 0,04 |
| ENST00000376223 | ENSG00000162496 | DHRS3     | -2,87 | 5,00E-05 | 0,01 |
| ENST00000304195 | ENSG00000172159 | FRMD3     | -3    | 0,00015  | 0,03 |



|                 |                 |          |       |          |      |
|-----------------|-----------------|----------|-------|----------|------|
| ENST00000359299 | ENSG00000109511 | ANXA10   | -3,13 | 5,00E-05 | 0,01 |
| ENST00000355754 | ENSG00000162654 | GBP4     | -3,13 | 5,00E-05 | 0,01 |
| ENST00000372930 | ENSG00000126950 | TMEM35   | -3,22 | 5,00E-05 | 0,01 |
| ENST00000296575 | ENSG00000164161 | HHIP     | -3,48 | 5,00E-05 | 0,01 |
| ENST00000326245 | ENSG00000179914 | ITLN1    | -3,49 | 0,0001   | 0,02 |
| ENST00000299502 | ENSG00000197632 | SERPINB2 | -3,50 | 5,00E-05 | 0,01 |
| ENST00000261292 | ENSG00000101670 | LIPG     | -3,65 | 5,00E-05 | 0,01 |
| ENST00000237612 | ENSG00000118777 | ABCG2    | -3,81 | 5,00E-05 | 0,01 |
| ENST00000397463 | ENSG00000150551 | LYPD1    | -3,98 | 5,00E-05 | 0,01 |
| ENST00000381405 | ENSG00000164283 | ESM1     | -4,14 | 5,00E-05 | 0,01 |
| ENST00000295461 | ENSG00000163293 | NIPAL1   | -4,22 | 5,00E-05 | 0,01 |
| ENST00000261405 | ENSG00000110799 | VWF      | -4,25 | 5,00E-05 | 0,01 |
| ENST00000378827 | ENSG00000125845 | BMP2     | -4,27 | 5,00E-05 | 0,01 |
| ENST00000263174 | ENSG00000099260 | PALMD    | -4,36 | 5,00E-05 | 0,01 |
| ENST00000395201 | ENSG00000162595 | DIRAS3   | -4,39 | 5,00E-05 | 0,01 |
| ENST00000271348 | ENSG00000143140 | GJA5     | -4,86 | 5,00E-05 | 0,01 |
| ENST00000409852 | ENSG00000163273 | NPPC     | -4,93 | 5,00E-05 | 0,01 |
| ENST00000282849 | ENSG00000140873 | ADAMTS18 | -6,48 | 5,00E-05 | 0,01 |
| ENST00000297316 | ENSG00000164736 | SOX17    | -6,48 | 5,00E-05 | 0,01 |
| ENST00000373674 | ENSG00000164530 | PI16     | -8,28 | 5,00E-05 | 0,01 |

**Supplementary Table S2. Analysis of differential isoform expression between S and A using Cufflinks method.** Fold Change (FC) valued is obtained by DeSeq2 method and p adjusted value ( $P_{adj}$ ) was calculated applying the FDR. Significant  $P_{adj}$  value was considered  $P_{adj} \leq 0.05$ .

| Category               | ID         | Name                                               | q-value  | Hit Count | Hit in Query List                                                                                                                                           |
|------------------------|------------|----------------------------------------------------|----------|-----------|-------------------------------------------------------------------------------------------------------------------------------------------------------------|
| GO: Biological Process | GO:0072359 | circulatory system development                     | 7,91E-06 | 21        | EPHB2,TBX18,BMP2,PTPRB,NRCAM,DHRS3,PRICKLE1,PI16,SGCD,KLF5,ANXA3,KCNJ8,SOCS3,GATA2,SOX17,ID1,XDH,ESM1,FLRT3,MYO18B,ITGA7                                    |
| GO: Biological Process | GO:0072358 | cardiovascular system development                  | 7,91E-06 | 21        | EPHB2,TBX18,BMP2,PTPRB,NRCAM,DHRS3,PRICKLE1,PI16,SGCD,KLF5,ANXA3,KCNJ8,SOCS3,GATA2,SOX17,ID1,XDH,ESM1,FLRT3,MYO18B,ITGA7                                    |
| GO: Biological Process | GO:0009888 | tissue development                                 | 6,90E-05 | 27        | TBX18,BMP2,NPPC,FRAS1,ADAMTS7,PRICKLE1,PI16,SGCD,KLF5,NRK,DDR2,SOCS3,RDH10,GATA2,SOX17,ID1,ID4,XDH,CLEC3B,FLRT3,SEMA3G,MYO18B,ITGA7,PTHLH,CRHR1,EPHA4,SMAD9 |
| GO: Biological Process | GO:0045595 | regulation of cell differentiation                 | 1,40E-04 | 24        | EPHB2,BMP2,NPPC,CHODL,NRCAM,HLA-B,ADAMTS7,PRICKLE1,PI16,KLF5,DDR2,SOCS3,GATA2,SOX17,ID1,ID4,XDH,APOA1,SEMA3G,LRRC4C,BAIAP2,PTHLH,EPHA4,SMAD9                |
| GO: Biological Process | GO:2000026 | regulation of multicellular organismal development | 1,40E-04 | 25        | EPHB2,TBX18,BMP2,CHODL,NRCAM,HLA-B,ADAMTS7,PRICKLE1,PI16,ANXA3,NRK,DDR2,SLITRK4,GATA2,SOX17,ID1,ID4,XDH,APOA1,FLRT3,SEMA3G,LRRC4C,BAIAP2,PTHLH,EPHA4        |
| GO: Biological Process | GO:0001655 | urogenital system development                      | 2,28E-04 | 11        | EPHB2,TBX18,BMP2,FRAS1,KCNJ8,RDH10,GATA2,SOX17,ID4,EPHA4,SMAD9                                                                                              |

|                        |            |                                                            |          |    |                                                                                                                                      |
|------------------------|------------|------------------------------------------------------------|----------|----|--------------------------------------------------------------------------------------------------------------------------------------|
| GO: Biological Process | GO:0001568 | blood vessel development                                   | 4,59E-04 | 14 | EPHB2,PTPRB,NRCAM,PRICKLE1,KLF5,ANXA3,SOCS3,GATA2,SOX17,ID1,XDH,ESM1,MYO18B,ITGA7                                                    |
| GO: Biological Process | GO:0001944 | vasculature development                                    | 6,29E-04 | 14 | EPHB2,PTPRB,NRCAM,PRICKLE1,KLF5,ANXA3,SOCS3,GATA2,SOX17,ID1,XDH,ESM1,MYO18B,ITGA7                                                    |
| GO: Biological Process | GO:0045596 | negative regulation of cell differentiation                | 6,45E-04 | 14 | EPHB2,BMP2,NPPC,ADAMTS7,PRICKLE1,PI16,GATA2,SOX17,ID1,ID4,XDH,SEMA3G,PTHLH,EPHA4                                                     |
| GO: Biological Process | GO:0051241 | negative regulation of multicellular organismal process    | 6,45E-04 | 18 | EPHB2,TBX18,BMP2,NPPC,ADAMTS7,PRICKLE1,PI16,GATA2,SOX17,ID1,ID4,IL20RB,XDH,APOA1,SEMA3G,RGS2,PTHLH,EPHA4                             |
| GO: Biological Process | GO:2000726 | negative regulation of cardiac muscle cell differentiation | 1,18E-03 | 3  | BMP2,PRICKLE1,PI16                                                                                                                   |
| GO: Biological Process | GO:0048514 | blood vessel morphogenesis                                 | 1,44E-03 | 12 | EPHB2,PTPRB,NRCAM,KLF5,ANXA3,GATA2,SOX17,ID1,XDH,ESM1,MYO18B,ITGA7                                                                   |
| Drug                   | D010100    | Oxygen                                                     | 1,76E-03 | 23 | CA12,PPP1R3C,IL11,KCNE4,RND1,PTPRB,MCHR1,MGST1,DHRS3,PDK1,NRK,G0S2,SOCS3,XDH,TMTC2,APOA1,FGF11,CLEC3B,ABCG2,FLRT3,PFKB4,FRMD3,HAPLN1 |
| Drug                   | D002737    | Chloroprene                                                | 1,82E-03 | 20 | PPP1R3C,RND1,NRCAM,KLF5,MYCT1,G0S2,DDR2,GATA2,SOX17,ID4,XDH,ESM1,TMTC2,ABCG2,FLRT3,BAIAP2,RGS2,RNF43,PTHLH,EPHA4                     |
| GO: Biological Process | GO:0051093 | negative regulation of developmental process               | 2,23E-03 | 15 | EPHB2,TBX18,BMP2,NPPC,ADAMTS7,PRICKLE1,PI16,GATA2,SOX17,ID1,ID4,XDH,SEMA3G,PTHLH,EPHA4                                               |

|                        |              |                                                              |          |    |                                                                                                                      |
|------------------------|--------------|--------------------------------------------------------------|----------|----|----------------------------------------------------------------------------------------------------------------------|
| GO: Biological Process | GO:0022603   | regulation of anatomical structure morphogenesis             | 2,23E-03 | 16 | EPHB2,TBX18,BMP2,SYNE3,NRCAM,ANXA3,GATA2,SOX17,ID1,XDH,APOA1,SEMA3G,LRRC4C,BAIAP2,ITGA7,EPHA4                        |
| GO: Biological Process | GO:0007507   | heart development                                            | 2,23E-03 | 12 | TBX18,BMP2,DHRS3,PRICKLE1,PI16,SGCD,KCNJ8,GATA2,SOX17,ID1,FLRT3,MYO18B                                               |
| Drug                   | C024746      | tobacco tar                                                  | 2,69E-03 | 8  | FRAS1,NRCAM,PRICKLE1,GLDC,ANXA10,ESM1,DMRTA1,RGS2                                                                    |
| GO: Biological Process | GO:0051094   | positive regulation of developmental process                 | 2,72E-03 | 18 | EPHB2,TBX18,BMP2,NPPC,NRCAM,KLF5,ANXA3,DDR2,SLITRK4,SOCS3,GATA2,SOX17,ID4,APOA1,FLRT3,BAIAP2,EPHA4,SMAD9             |
| GO: Biological Process | GO:0048585   | negative regulation of response to stimulus                  | 4,05E-03 | 19 | TBX18,BMP2,DHRS3,HLA-B,PRICKLE1,SOCS3,GATA2,SOX17,IL20RB,XDH,APOA1,FLRT3,SEMA3G,LRRC4C,RGS2,RNF43,CRHR1,DKK2,EPHA4   |
| GO: Biological Process | GO:0002009   | morphogenesis of an epithelium                               | 4,32E-03 | 11 | TBX18,BMP2,FRAS1,PRICKLE1,SOC S3,RDH10,SOX17,ID4,FLRT3,PTHLH,EPHA4                                                   |
| GO: Biological Process | GO:0010769   | regulation of cell morphogenesis involved in differentiation | 6,16E-03 | 9  | EPHB2,BMP2,NRCAM,ID1,APOA1,SEMA3G,LRRC4C,BAIAP2,EPHA4                                                                |
| Drug                   | CID005282222 | xanthoxin                                                    | 6,22E-03 | 3  | DHRS3,SDPR,MOCOS                                                                                                     |
| Drug                   | C089730      | rosiglitazone                                                | 6,22E-03 | 20 | PPP1R3C,BMP2,RND1,MGST1,DHRS3,PDK1,KLF5,ANXA3,KCNJ8,G0S2,C10orf10,SLITRK4,SOCS3,ANXA10,RDH10,ID1,ID4,XDH,CLEC3B,RGS2 |
| GO: Biological Process | GO:0022604   | regulation of cell morphogenesis                             | 7,76E-03 | 11 | EPHB2,BMP2,SYNE3,NRCAM,ID1,AP OA1,SEMA3G,LRRC4C,BAIAP2,ITGA                                                          |

|                        |              |                                             |          |    |                                                                                                               |
|------------------------|--------------|---------------------------------------------|----------|----|---------------------------------------------------------------------------------------------------------------|
|                        |              |                                             |          |    | 7,EPHA4                                                                                                       |
| Gene Family            | ANXA         | Annexins                                    | 8,94E-03 | 2  | ANXA3,ANXA10                                                                                                  |
| Gene Family            | IL           | Interleukins and interleukin receptors      | 8,94E-03 | 3  | IL11,IL20RB,IL17RD                                                                                            |
| GO: Biological Process | GO:0072001   | renal system development                    | 9,14E-03 | 8  | TBX18,BMP2,FRAS1,KCNJ8,RDH10,SOX17,EPHA4,SMAD9                                                                |
| Drug                   | CID000093003 | 6-chloropurine riboside                     | 1,08E-02 | 3  | ID1,XDH,MOCOS                                                                                                 |
| Drug                   | CID006437077 | AC1O5MYK                                    | 1,08E-02 | 5  | PPP1R3C,TNFAIP8L3,MGST1,NRK,PPP1R1C                                                                           |
| Drug                   | CID000002524 | 1-alpha-25-dihydroxycholecalciferol         | 1,08E-02 | 14 | CA12,IL11,BMP2,TNFAIP8L3,MGST1,SOCS3,GATA2,ID1,PPP1R1C,TMTC2,BAIAP2,ITGA7,RNF43,PTHLH                         |
| GO: Biological Process | GO:0045597   | positive regulation of cell differentiation | 1,10E-02 | 14 | EPHB2,BMP2,NPPC,NRCAM,KLF5,DDR2,SOCS3,GATA2,SOX17,ID4,APOA1,BAIAP2,EPHA4,SMAD9                                |
| GO: Molecular Function | GO:0052650   | NADP-retinol dehydrogenase activity         | 1,15E-02 | 2  | DHRS3,RDH10                                                                                                   |
| GO: Molecular Function | GO:0004745   | retinol dehydrogenase activity              | 1,15E-02 | 3  | BMP2,DHRS3,RDH10                                                                                              |
| GO: Molecular Function | GO:0042802   | identical protein binding                   | 1,15E-02 | 17 | EPHB2,CADM3,TBX18,BMP2,NPPC,MGST1,PKK1,GLDC,DAPK2,ID1,XDH,APOA1,DMRTA1,ABCG2,FLRT3,BAIAP2,EPHA4               |
| GO: Molecular Function | GO:0005102   | receptor binding                            | 1,15E-02 | 19 | EPHB2,IL11,CADM3,BMP2,NPPC,RND1,MCHR1,HLA-B,NRXN2,KCNJ8,ESM1,APOA1,FGF11,FLRT3,SEMA3G,ITGA7,RNF43,PTHLH,EPHA4 |
| GO: Biological Process | GO:0007413   | axonal fasciculation                        | 1,21E-02 | 3  | EPHB2,NRCAM,EPHA4                                                                                             |

|                        |            |                                                          |          |    |                                                                                                  |
|------------------------|------------|----------------------------------------------------------|----------|----|--------------------------------------------------------------------------------------------------|
| GO: Biological Process | GO:0060284 | regulation of cell development                           | 1,21E-02 | 14 | EPHB2,BMP2,NPPC,CHODL,NRCAM,PI16,GATA2,ID1,ID4,APOA1,SEMA3G,LRRC4C,BAIAP2,EPHA4                  |
| GO: Biological Process | GO:0060429 | epithelium development                                   | 1,21E-02 | 16 | TBX18,BMP2,FRAS1,PRICKLE1,KLF5,SOCS3,RDH10,SOX17,ID1,ID4,XDH,FLRT3,PTHLH,CRHR1,EPHA4,SMAD9       |
| GO: Biological Process | GO:0055026 | negative regulation of cardiac muscle tissue development | 1,31E-02 | 3  | BMP2,PRICKLE1,PI16                                                                               |
| GO: Biological Process | GO:0051960 | regulation of nervous system development                 | 1,32E-02 | 13 | EPHB2,BMP2,CHODL,NRCAM,SLITRK4,GATA2,ID1,ID4,FLRT3,SEMA3G,LRRC4C,BAIAP2,EPHA4                    |
| GO: Biological Process | GO:0045664 | regulation of neuron differentiation                     | 1,36E-02 | 11 | EPHB2,BMP2,CHODL,NRCAM,GATA2,ID1,ID4,SEMA3G,LRRC4C,BAIAP2,EPHA4                                  |
| GO: Molecular Function | GO:0030151 | molybdenum ion binding                                   | 1,49E-02 | 2  | XDH,MOCOS                                                                                        |
| GO: Molecular Function | GO:0045499 | chemorepellent activity                                  | 1,49E-02 | 3  | APOA1,FLRT3,SEMA3G                                                                               |
| GO: Molecular Function | GO:0046983 | protein dimerization activity                            | 1,49E-02 | 16 | CADM3,TBX18,BMP2,NPPC,MGST1,PK1,GLDC,SOX17,ID1,ID4,XDH,DMRTA1,ABCG2,FLRT3,ITGA7,CHRNA5           |
| GO: Biological Process | GO:0048598 | embryonic morphogenesis                                  | 1,51E-02 | 11 | EPHB2,TBX18,FRAS1,PRICKLE1,SOC S3,RDH10,GATA2,SOX17,APOA1,FLR T3,ITGA7                           |
| GO: Biological Process | GO:0009790 | embryo development                                       | 1,51E-02 | 15 | EPHB2,TBX18,BMP2,FRAS1,PRICKL E1,NRK,SOCS3,RDH10,GATA2,SOX1 7,APOA1,ABCG2,FLRT3,MYO18B,IT GA7    |
| GO: Biological Process | GO:0023057 | negative regulation of signaling                         | 1,51E-02 | 16 | IL11,TBX18,BMP2,DHRS3,PRICKLE1, SOCS3,GATA2,SOX17,XDH,APOA1,F LRT3,LRRC4C,RGS2,RNF43,CRHR1,D KK2 |

|                        |            |                                                                            |          |    |                                                                                                                  |
|------------------------|------------|----------------------------------------------------------------------------|----------|----|------------------------------------------------------------------------------------------------------------------|
| GO: Molecular Function | GO:0042803 | protein homodimerization activity                                          | 1,53E-02 | 12 | CADM3,TBX18,BMP2,NPPC,MGST1,PK1,GLDC,ID1,XDH,DMRTA1,ABCG2,FLRT3                                                  |
| GO: Cellular Component | GO:0005887 | integral component of plasma membrane                                      | 1,56E-02 | 19 | EPHB2,CADM3,BMP2,KCNE4,PTPRB,MCHR1,NRCAM,HLA-B,SGCD,KCNJ8,DDR2,FLRT3,ITGA7,IL17RD,RNF43,CRHR1,CHRNA5,CHRNE,EPHA4 |
| GO: Cellular Component | GO:0031226 | intrinsic component of plasma membrane                                     | 1,56E-02 | 19 | EPHB2,CADM3,BMP2,KCNE4,PTPRB,MCHR1,NRCAM,HLA-B,SGCD,KCNJ8,DDR2,FLRT3,ITGA7,IL17RD,RNF43,CRHR1,CHRNA5,CHRNE,EPHA4 |
| GO: Biological Process | GO:0003308 | negative regulation of Wnt signaling pathway involved in heart development | 1,60E-02 | 2  | BMP2,SOX17                                                                                                       |
| GO: Biological Process | GO:0010648 | negative regulation of cell communication                                  | 1,60E-02 | 16 | IL11,TBX18,BMP2,DHRS3,PRICKLE1,SOCS3,GATA2,SOX17,XDH,APOA1,FLRT3,LRRC4C,RGS2,RNF43,CRHR1,DKK2                    |
| GO: Biological Process | GO:2000725 | regulation of cardiac muscle cell differentiation                          | 1,61E-02 | 3  | BMP2,PRICKLE1,PI16                                                                                               |
| GO: Biological Process | GO:0045669 | positive regulation of osteoblast differentiation                          | 1,61E-02 | 4  | BMP2,NPPC,DDR2,ID4                                                                                               |
| GO: Biological Process | GO:0045667 | regulation of osteoblast differentiation                                   | 1,61E-02 | 5  | BMP2,NPPC,DDR2,ID1,ID4                                                                                           |
| GO: Biological Process | GO:0001525 | angiogenesis                                                               | 1,61E-02 | 9  | EPHB2,PTPRB,NRCAM,KLF5,ANXA3,GATA2,SOX17,ID1,ESM1                                                                |

|                        |            |                                                             |          |    |                                                                                                                              |
|------------------------|------------|-------------------------------------------------------------|----------|----|------------------------------------------------------------------------------------------------------------------------------|
| GO: Biological Process | GO:0051174 | regulation of phosphorus metabolic process                  | 1,61E-02 | 20 | IL11,BMP2,NPPC,TNFAIP8L3,PDK1,NRK,DDR2,SOCS3,ID1,PPP1R1C,XDH,APOA1,FLRT3,LRRC4C,IL17RD,RGS2,PTHLH,CRHR1,DIRAS3,EPHA4         |
| GO: Biological Process | GO:0045995 | regulation of embryonic development                         | 1,67E-02 | 5  | TBX18,NRK,GATA2,SOX17,APOA1                                                                                                  |
| GO: Biological Process | GO:0035295 | tube development                                            | 1,68E-02 | 11 | TBX18,BMP2,PRICKLE1,KLF5,RDH10,GATA2,SOX17,ID1,PTHLH,EPHA4,SMAD9                                                             |
| GO: Biological Process | GO:0030178 | negative regulation of Wnt signaling pathway                | 1,68E-02 | 6  | TBX18,BMP2,PRICKLE1,SOX17,RNF43,DKK2                                                                                         |
| GO: Biological Process | GO:0048729 | tissue morphogenesis                                        | 1,73E-02 | 11 | TBX18,BMP2,FRAS1,PRICKLE1,SOCS3,RDH10,SOX17,ID4,FLRT3,PTHLH,EPHA4                                                            |
| GO: Biological Process | GO:0051154 | negative regulation of striated muscle cell differentiation | 1,79E-02 | 3  | BMP2,PRICKLE1,PI16                                                                                                           |
| GO: Biological Process | GO:0030278 | regulation of ossification                                  | 1,79E-02 | 6  | BMP2,NPPC,DHRS3,DDR2,ID1,ID4                                                                                                 |
| Drug                   | D012822    | Silicon Dioxide                                             | 1,93E-02 | 21 | IL11,BMP2,NPPC,FRAS1,PTPRB,PI16,KCNJ8,G0S2,SLITRK4,SOCS3,XDH,ESM1,DMRTA1,CLEC3B,ABCG2,FLRT3,SEMA3G,LRRC4C,RGS2,DIRAS3,HAPLN1 |
| GO: Biological Process | GO:0048710 | regulation of astrocyte differentiation                     | 1,94E-02 | 3  | BMP2,ID4,EPHA4                                                                                                               |
| GO: Biological Process | GO:0006468 | protein phosphorylation                                     | 2,00E-02 | 20 | EPHB2,IL11,BMP2,TNFAIP8L3,PDK1,DAPK2,NRK,DDR2,SOCS3,ID1,PPP1R1C,XDH,APOA1,FLRT3,LRRC4C,IL17RD,RGS2,DIRAS3,EPHA4,SMAD9        |
| GO: Biological Process | GO:0048738 | cardiac muscle tissue development                           | 2,01E-02 | 6  | TBX18,BMP2,PRICKLE1,PI16,SGCD,MYO18B                                                                                         |



|                        |              |                                                                   |          |    |                                                                                                                                |
|------------------------|--------------|-------------------------------------------------------------------|----------|----|--------------------------------------------------------------------------------------------------------------------------------|
| GO: Biological Process | GO:0014706   | striated muscle tissue development                                | 2,01E-02 | 8  | TBX18,BMP2,PRICKLE1,PI16,SGCD, KLF5,SOX17,MYO18B                                                                               |
| GO: Biological Process | GO:0040007   | growth                                                            | 2,01E-02 | 14 | BMP2,NPPC,NRCAM,PI16,NRK,DDR2 ,SOCS3,RDH10,SOX17,PPP1R1C,ESM 1,FLRT3,SEMA3G,PTHLH                                              |
| Drug                   | CID003619466 | rotigotine patch                                                  | 2,15E-02 | 5  | CA12,PTPRB,TNFAIP8L3,CD248,CLE C3B                                                                                             |
| GO: Biological Process | GO:0003307   | regulation of Wnt signaling pathway involved in heart development | 2,15E-02 | 2  | BMP2,SOX17                                                                                                                     |
| GO: Biological Process | GO:0001503   | ossification                                                      | 2,18E-02 | 8  | BMP2,NPPC,DHRS3,DDR2,ID1,ID4,C LEC3B,PTHLH                                                                                     |
| Drug                   | C015001      | arsenite                                                          | 2,18E-02 | 19 | EPHB2,PPP1R3C,NPPC,FRAS1,DHRS3 ,NRXN2,PRICKLE1,SGCD,KLF5,G0S2 ,ST6GALNAC5,SOX17,BAIAP2,ITGA7 ,PTHLH,MAB21L1,SDPR,DIRAS3,FR MD3 |
| Drug                   | D003907      | Dexamethasone                                                     | 2,18E-02 | 19 | CA12,BMP2,NPPC,MGST1,DHRS3,NR XN2,PI16,PDK1,KLF5,ANXA3,G0S2,X DH,APOA1,CLEC3B,ABCG2,RGS2,PT HLH,SDPR,GULP1                     |
| GO: Biological Process | GO:0035051   | cardiocyte differentiation                                        | 2,24E-02 | 5  | BMP2,PRICKLE1,PI16,SOX17,MYO18 B                                                                                               |
| GO: Biological Process | GO:0007517   | muscle organ development                                          | 2,24E-02 | 8  | BMP2,CHODL,PRICKLE1,PI16,SGCD, KLF5,SOX17,ITGA7                                                                                |
| Drug                   | CID000129935 | CGP 31608                                                         | 2,25E-02 | 2  | CD248,ID1                                                                                                                      |
| Drug                   | C032668      | 1-nitropyrene                                                     | 2,25E-02 | 7  | BMP2,PTPRB,G0S2,XDH,ESM1,PTHL H,MOCOS                                                                                          |

|                        |                        |                                                  |          |    |                                                                                                                  |
|------------------------|------------------------|--------------------------------------------------|----------|----|------------------------------------------------------------------------------------------------------------------|
| Drug                   | D010126                | Ozone                                            | 2,25E-02 | 15 | NPPC,KCNE4,MGST1,NRXN2,KLF5,MYCT1,ANXA3,KCNJ8,G0S2,SOCS3,IDI1,CLEC3B,ABCG2,PFKFB4,SDPR                           |
| Drug                   | C057693                | troglitazone                                     | 2,25E-02 | 16 | CA12,IL11,BMP2,RND1,DHRS3,ANXA3,KCNJ8,G0S2,C10orf10,ANXA10,GATA2,ID1,ID4,APOA1,ABCG2,RGS2                        |
| Drug                   | D008070                | Lipopolysaccharides                              | 2,25E-02 | 17 | EPHB2,IL11,BMP2,PDK1,KCNJ8,G0S2,SOCS3,GATA2,SOX17,ID4,ESM1,APOA1,ABCG2,ITGA7,IL17RD,RGS2,CRHR1                   |
| Drug                   | D019833                | Genistein                                        | 2,25E-02 | 20 | CA12,PPP1R3C,BMP2,NPPC,MGST1,DHRS3,ADAMTS7,PDK1,GLDC,ANXA3,G0S2,SOCS3,ID1,ID4,XDH,ESM1,APOA1,ABCG2,PFKFB4,CHRNA5 |
| GO: Biological Process | GO:0001649             | osteoblast differentiation                       | 2,27E-02 | 6  | BMP2,NPPC,DDR2,ID1,ID4,PTHLH                                                                                     |
| Drug                   | D013755                | Tetradecanoylphorbol Acetate                     | 2,27E-02 | 12 | IL11,BMP2,NRXN2,ANXA3,DAPK2,SOCS3,ANXA10,GATA2,SOX17,XDH,ITGA7,PTHLH                                             |
| GO: Biological Process | GO:0045444             | fat cell differentiation                         | 2,33E-02 | 6  | IL11,BMP2,KLF5,GATA2,ID4,RGS2                                                                                    |
| Drug                   | CID000002619           | AC1L1E32                                         | 2,37E-02 | 2  | CD248,ABCG2                                                                                                      |
| Drug                   | C038518                | acrylodan                                        | 2,37E-02 | 2  | MGST1,APOA1                                                                                                      |
| Drug                   | CID000005325           | sulfamerazine                                    | 2,37E-02 | 3  | MGST1,SGCD,IL17RD                                                                                                |
| Drug                   | MESH:D013274/D004052-M | Stomach Neoplasms affected by Diethylnitrosamine | 2,37E-02 | 4  | BMP2,ID4,APOA1,RGS2                                                                                              |
| Drug                   | D003609                | Dactinomycin                                     | 2,37E-02 | 7  | IL11,NPPC,SOCS3,SOX17,ID1,ID4,ABCG2                                                                              |
| Drug                   | D015124                | 8-Bromo Cyclic Adenosine Monophosphate           | 2,37E-02 | 11 | PPP1R3C,FRAS1,KCNE4,MGST1,NRCAM,DHRS3,SGCD,SOCS3,ID1,PTHLH,MOCOS                                                 |

|                        |              |                                                                   |          |    |                                                                                                                 |
|------------------------|--------------|-------------------------------------------------------------------|----------|----|-----------------------------------------------------------------------------------------------------------------|
| Drug                   | C548651      | 2-(1'H-indolo-3'-carbonyl)thiazole-4-carboxylic acid methyl ester | 2,37E-02 | 12 | PPP1R3C,BMP2,PTPRB,CD248,PDK1,DDR2,ID1,ID4,XDH,FLRT3,EPHA4,GULP1                                                |
| Drug                   | D000393      | Air Pollutants                                                    | 2,37E-02 | 13 | CA12,IL11,FRAS1,RND1,TNFAIP8L3,DHRS3,ANXA3,ANXA10,ID1,XDH,ABCG2,SDPR,FRMD3                                      |
| Drug                   | CID000003003 | Betamethasone-d5                                                  | 2,37E-02 | 16 | IL11,BMP2,NPPC,TNFAIP8L3,ANXA3,ANXA10,ID1,XDH,APOA1,CLEC3B,ABCG2,ITGA7,PTHLH,CRHR1,CHRNE,HAPLN1                 |
| GO: Biological Process | GO:0060537   | muscle tissue development                                         | 2,38E-02 | 8  | TBX18,BMP2,PRICKLE1,PI16,SGCD,KLF5,SOX17,MYO18B                                                                 |
| GO: Biological Process | GO:0045602   | negative regulation of endothelial cell differentiation           | 2,42E-02 | 2  | ID1,XDH                                                                                                         |
| GO: Biological Process | GO:0031648   | protein destabilization                                           | 2,42E-02 | 3  | BMP2,SOX17,ID1                                                                                                  |
| GO: Biological Process | GO:0008038   | neuron recognition                                                | 2,42E-02 | 3  | EPHB2,NRCAM,EPHA4                                                                                               |
| GO: Biological Process | GO:0007416   | synapse assembly                                                  | 2,42E-02 | 5  | EPHB2,NRCAM,NRXN2,SLITRK4,FLRT3                                                                                 |
| GO: Biological Process | GO:0000904   | cell morphogenesis involved in differentiation                    | 2,42E-02 | 14 | EPHB2,BMP2,RND1,NRCAM,SLITRK4,SOX17,ID1,APOA1,FLRT3,SEMA3G,LRRC4C,BAIAP2,IL17RD,EPHA4                           |
| GO: Biological Process | GO:0009968   | negative regulation of signal transduction                        | 2,42E-02 | 14 | TBX18,BMP2,DHRS3,PRICKLE1,SOC3,GATA2,SOX17,XDH,APOA1,FLRT3,LRRC4C,RGS2,RNF43,DKK2                               |
| GO: Biological Process | GO:0019220   | regulation of phosphate metabolic process                         | 2,42E-02 | 19 | IL11,BMP2,NPPC,TNFAIP8L3,NRK,DDR2,SOCS3,ID1,PPP1R1C,XDH,APOA1,FLRT3,LRRC4C,IL17RD,RGS2,PTHLH,CRHR1,DIRAS3,EPHA4 |

|                        |              |                                                          |          |    |                                                                                         |
|------------------------|--------------|----------------------------------------------------------|----------|----|-----------------------------------------------------------------------------------------|
| GO: Biological Process | GO:0048646   | anatomical structure formation involved in morphogenesis | 2,45E-02 | 15 | EPHB2,TBX18,BMP2,PTPRB,NRCAM,PRICKLE1,KLF5,ANXA3,RDH10,GATA2,SOX17,ID1,ESM1,ITGA7,PTHLH |
| Drug                   | CID000057056 | AC1L1M7Y                                                 | 2,53E-02 | 4  | IL11,SOCS3,RGS2,PTHLH                                                                   |
| Disease                | ctd:D002357  | Cartilage Diseases                                       | 2,57E-02 | 2  | NPPC,GATA2                                                                              |
| Disease                | ctd:D003865  | Depressive Disorder, Major                               | 2,57E-02 | 2  | XDH,CRHR1                                                                               |
| Disease                | ctd:D001528  | Behcet Syndrome                                          | 2,57E-02 | 2  | HLA-B,APOA1                                                                             |
| Disease                | ctd:D003875  | Drug Eruptions                                           | 2,57E-02 | 2  | HLA-B,APOA1                                                                             |
| GO: Biological Process | GO:0001501   | skeletal system development                              | 2,62E-02 | 9  | BMP2,NPPC,DHRS3,ADAMTS7,RDH10,CLEC3B,PTHLH,HAPLN1,SMAD9                                 |
| GO: Biological Process | GO:0050767   | regulation of neurogenesis                               | 2,73E-02 | 11 | EPHB2,BMP2,CHODL,NRCAM,GATA2,ID1,ID4,SEMA3G,LRRC4C,BAIAP2,EPHA4                         |
| GO: Biological Process | GO:0060997   | dendritic spine morphogenesis                            | 2,80E-02 | 3  | EPHB2,BAIAP2,EPHA4                                                                      |
| GO: Biological Process | GO:0061061   | muscle structure development                             | 2,80E-02 | 10 | TBX18,BMP2,CHODL,PRICKLE1,PI16,SGCD,KLF5,SOX17,MYO18B,ITGA7                             |
| Drug                   | CID000003640 | AC1Q5HK6                                                 | 2,86E-02 | 9  | IL11,BMP2,TNFAIP8L3,XDH,ESM1,APOA1,PTHLH,CRHR1,CHRNE                                    |
| Disease                | ctd:D015179  | Colorectal Neoplasms                                     | 2,90E-02 | 5  | NRCAM,SOX17,ABCG2,RNF43,HAPLN1                                                          |
| Drug                   | CID000003413 | forskolin from Coleus forskohlii                         | 3,11E-02 | 13 | PPP1R3C,BMP2,NPPC,TNFAIP8L3,MCHR1,KCNJ8,NRK,XDH,RGS2,PTHLH,CRHR1,CHRNE,HAPLN1           |
| Disease                | ctd:D020022  | Genetic Predisposition to Disease                        | 3,11E-02 | 2  | HLA-B,KCNJ8                                                                             |
| Disease                | ctd:D008325  | Mammary Neoplasms, Experimental                          | 3,11E-02 | 4  | G0S2,ID1,ID4,XDH                                                                        |
| GO: Biological Process | GO:0090090   | negative regulation of canonical Wnt signaling pathway   | 3,14E-02 | 5  | TBX18,BMP2,PRICKLE1,SOX17,DKK2                                                          |

|                        |              |                                                           |          |    |                                                                                                |
|------------------------|--------------|-----------------------------------------------------------|----------|----|------------------------------------------------------------------------------------------------|
| Drug                   | D008748      | Methylcholanthrene                                        | 3,26E-02 | 13 | CA12,NRXN2,KLF5,DAPK2,SOCS3,SOX17,XDH,TMTC2,APOA1,ABCG2,BAIAP2,ITGA7,GULP1                     |
| Drug                   | C022909      | 5-methoxypsoralen                                         | 3,27E-02 | 2  | BMP2,SMAD9                                                                                     |
| GO: Biological Process | GO:0050919   | negative chemotaxis                                       | 3,37E-02 | 3  | APOA1,FLRT3,SEMA3G                                                                             |
| GO: Biological Process | GO:0045778   | positive regulation of ossification                       | 3,37E-02 | 4  | BMP2,NPPC,DDR2,ID4                                                                             |
| GO: Biological Process | GO:0072089   | stem cell proliferation                                   | 3,37E-02 | 5  | TBX18,BMP2,SOX17,ID4,RNF43                                                                     |
| GO: Biological Process | GO:0010721   | negative regulation of cell development                   | 3,38E-02 | 7  | EPHB2,NPPC,PI16,ID1,ID4,SEMA3G,EPHA4                                                           |
| Drug                   | D005944      | Glucosamine                                               | 3,39E-02 | 7  | IL11,BMP2,RND1,ID1,XDH,APOA1,HAPLN1                                                            |
| GO: Biological Process | GO:0045843   | negative regulation of striated muscle tissue development | 3,67E-02 | 3  | BMP2,PRICKLE1,PI16                                                                             |
| GO: Molecular Function | GO:0005005   | transmembrane-ephrin receptor activity                    | 3,75E-02 | 2  | EPHB2,EPHA4                                                                                    |
| Disease                | ctd:D001008  | Anxiety Disorders                                         | 3,80E-02 | 2  | CRHR1,CHRNA5                                                                                   |
| Disease                | ctd:D006130  | Growth Disorders                                          | 3,82E-02 | 2  | NPPC,PTHLH                                                                                     |
| Disease                | ctd:D001172  | Arthritis, Rheumatoid                                     | 3,82E-02 | 4  | ANXA3,ST6GALNAC5,ABCG2,HAPLN1                                                                  |
| Disease                | ctd:D013274  | Stomach Neoplasms                                         | 3,82E-02 | 5  | BMP2,ID4,APOA1,RGS2,RNF43                                                                      |
| GO: Biological Process | GO:0001932   | regulation of protein phosphorylation                     | 3,85E-02 | 16 | IL11,BMP2,TNFAIP8L3,NRK,DDR2,SOCS3,ID1,PPP1R1C,XDH,APOA1,FLRT3,LRRC4C,IL17RD,RGS2,DIRAS3,EPHA4 |
| Drug                   | CID000004938 | propentofylline                                           | 3,92E-02 | 3  | XDH,EPHA4,HAPLN1                                                                               |
| GO: Biological Process | GO:0048635   | negative regulation of muscle organ development           | 4,07E-02 | 3  | BMP2,PRICKLE1,PI16                                                                             |

|                        |              |                                                     |          |    |                                                                                   |
|------------------------|--------------|-----------------------------------------------------|----------|----|-----------------------------------------------------------------------------------|
| Drug                   | D012906      | Smoke                                               | 4,09E-02 | 12 | CA12,NRCAM,PRICKLE1,GLDC,KLF5,ANXA3,ST6GALNAC5,SOCS3,IL20RB,TMTC2,ABCG2,MOCOS     |
| GO: Biological Process | GO:0002062   | chondrocyte differentiation                         | 4,10E-02 | 4  | BMP2,NPPC,ADAMTS7,PTHLH                                                           |
| GO: Biological Process | GO:0061448   | connective tissue development                       | 4,11E-02 | 6  | BMP2,NPPC,ADAMTS7,ID4,PTHLH,SMAD9                                                 |
| GO: Biological Process | GO:1901862   | negative regulation of muscle tissue development    | 4,11E-02 | 3  | BMP2,PRICKLE1,PI16                                                                |
| GO: Biological Process | GO:0046426   | negative regulation of JAK-STAT cascade             | 4,11E-02 | 3  | SOCS3,FLRT3,LRRC4C                                                                |
| GO: Biological Process | GO:0003306   | Wnt signaling pathway involved in heart development | 4,11E-02 | 2  | BMP2,SOX17                                                                        |
| GO: Biological Process | GO:0034113   | heterotypic cell-cell adhesion                      | 4,16E-02 | 3  | NRCAM,APOA1,ITGA7                                                                 |
| GO: Biological Process | GO:0097061   | dendritic spine organization                        | 4,16E-02 | 3  | EPHB2,BAIAP2,EPHA4                                                                |
| GO: Biological Process | GO:0010975   | regulation of neuron projection development         | 4,16E-02 | 8  | EPHB2,CHODL,NRCAM,ID1,SEMA3G,LRRC4C,BAIAP2,EPHA4                                  |
| GO: Biological Process | GO:0009792   | embryo development ending in birth or egg hatching  | 4,16E-02 | 10 | TBX18,BMP2,PRICKLE1,NRK,SOCS3,RDH10,GATA2,SOX17,ABCG2,MYO18B                      |
| GO: Biological Process | GO:0061564   | axon development                                    | 4,19E-02 | 11 | EPHB2,RND1,NRCAM,SLITRK4,APOA1,FLRT3,SEMA3G,LRRC4C,BAIAP2,IL17RD,EPHA4            |
| Drug                   | CID000005337 | anti-K                                              | 4,22E-02 | 3  | HLA-B,SGCD,NRK                                                                    |
| GO: Biological Process | GO:0051338   | regulation of transferase activity                  | 4,25E-02 | 13 | BMP2,TNFAIP8L3,NRK,DDR2,SOCS3,PPP1R1C,APOA1,FLRT3,LRRC4C,IL17RD,RGS2,DIRAS3,EPHA4 |
| GO: Biological Process | GO:0048568   | embryonic organ development                         | 4,26E-02 | 8  | EPHB2,TBX18,BMP2,NRK,SOCS3,RDH10,GATA2,SOX17                                      |

|                        |                         |                                                   |          |    |                                                                             |
|------------------------|-------------------------|---------------------------------------------------|----------|----|-----------------------------------------------------------------------------|
| GO: Biological Process | GO:0010614              | negative regulation of cardiac muscle hypertrophy | 4,32E-02 | 2  | PI16,RGS2                                                                   |
| GO: Biological Process | GO:1900745              | positive regulation of p38MAPK cascade            | 4,32E-02 | 2  | BMP2,XDH                                                                    |
| GO: Biological Process | GO:0030282              | bone mineralization                               | 4,32E-02 | 4  | BMP2,DDR2,CLEC3B,PTHLH                                                      |
| GO: Biological Process | GO:0050770              | regulation of axonogenesis                        | 4,33E-02 | 5  | EPHB2,NRCAM,SEMA3G,LRRC4C,EPHA4                                             |
| GO: Biological Process | GO:0043549              | regulation of kinase activity                     | 4,33E-02 | 12 | BMP2,TNFAIP8L3,NRK,DDR2,SOCS3,PPP1R1C,FLRT3,LRRC4C,IL17RD,RGS2,DIRAS3,EPHA4 |
| Drug                   | CID005282224            | abscisic aldehyde                                 | 4,36E-02 | 2  | DHRS3,SDPR                                                                  |
| Disease                | ctd:C538231             | Adenocarcinoma of lung                            | 4,36E-02 | 2  | DDR2,APOA1                                                                  |
| Disease                | ctd:D000022             | Abortion, Spontaneous                             | 4,36E-02 | 3  | IL11,FLRT3,PTHLH                                                            |
| Disease                | ctd:D001943             | Breast Neoplasms                                  | 4,50E-02 | 6  | BMP2,NRCAM,C10orf10,ABCG2,RGS2,PTHLH                                        |
| Drug                   | CID005321959            | Tn-1                                              | 4,53E-02 | 3  | HLA-B,CD248,CLEC3B                                                          |
| GO: Biological Process | GO:0060348              | bone development                                  | 4,60E-02 | 5  | BMP2,NPPC,DHRS3,PTHLH,SMAD9                                                 |
| Drug                   | CID000005566            | trifluoperazine                                   | 4,61E-02 | 7  | PPP1R3C,ANXA3,ANXA10,PPP1R1C,XDH,MYO18B,CHRNE                               |
| Drug                   | MESH:D001943 /C014347-T | Breast Neoplasms affected by decitabine           | 4,61E-02 | 4  | BMP2,NRCAM,ABCG2,RGS2                                                       |
| GO: Biological Process | GO:0055007              | cardiac muscle cell differentiation               | 4,69E-02 | 4  | BMP2,PRICKLE1,PI16,MYO18B                                                   |
| GO: Biological Process | GO:0060033              | anatomical structure regression                   | 4,76E-02 | 2  | CD248,SMAD9                                                                 |
| Drug                   | CID000007272            | lactide                                           | 4,77E-02 | 3  | BMP2,MOCOS,HAPLN1                                                           |
| Drug                   | CID000000338            | salicylate                                        | 4,77E-02 | 7  | TNFAIP8L3,MCHR1,SOCS3,XDH,CLEC3B,ABCG2,MOCOS                                |
| Disease                | ctd:D064420             | Drug-Related Side Effects and Adverse Reactions   | 5,01E-02 | 2  | HLA-B,ABCG2                                                                 |

|                        |            |                                                         |          |    |                                                                                                                  |
|------------------------|------------|---------------------------------------------------------|----------|----|------------------------------------------------------------------------------------------------------------------|
| GO: Biological Process | GO:0014741 | negative regulation of muscle hypertrophy               | 5,05E-02 | 2  | PI16,RGS2                                                                                                        |
| GO: Biological Process | GO:0060712 | spongiotrophoblast layer development                    | 5,05E-02 | 2  | NRK,SOCS3                                                                                                        |
| GO: Biological Process | GO:0045598 | regulation of fat cell differentiation                  | 5,05E-02 | 4  | BMP2,KLF5,GATA2,ID4                                                                                              |
| GO: Biological Process | GO:0051216 | cartilage development                                   | 5,05E-02 | 5  | BMP2,NPPC,ADAMTS7,PTHLH,SMA D9                                                                                   |
| GO: Biological Process | GO:0001822 | kidney development                                      | 5,05E-02 | 6  | BMP2,FRAS1,KCNJ8,RDH10,EPHA4,S MAD9                                                                              |
| GO: Biological Process | GO:0031344 | regulation of cell projection organization              | 5,05E-02 | 9  | EPHB2,CHODL,NRCAM,KLF5,ID1,SE MA3G,LRRC4C,BAIAP2,EPHA4                                                           |
| GO: Biological Process | GO:0016477 | cell migration                                          | 5,05E-02 | 14 | BMP2,NRCAM,CD248,ANXA3,DAPK 2,DDR2,GATA2,SOX17,ID1,APOA1,F LRT3,SEMA3G,ITGA7,EPHA4                               |
| GO: Biological Process | GO:0000902 | cell morphogenesis                                      | 5,05E-02 | 16 | EPHB2,BMP2,RND1,SYNE3,NRCAM, SLITRK4,SOX17,ID1,APOA1,FLRT3,S EMA3G,LRRC4C,BAIAP2,ITGA7,IL17 RD,EPHA4             |
| GO: Biological Process | GO:0051240 | positive regulation of multicellular organismal process | 5,05E-02 | 16 | EPHB2,TBX18,BMP2,NPPC,NRCAM, ANXA3,DDR2,SLITRK4,GATA2,SOX 17,ID4,IL20RB,FLRT3,BAIAP2,RGS2, EPHA4                 |
| GO: Biological Process | GO:0031399 | regulation of protein modification process              | 5,06E-02 | 18 | IL11,BMP2,TNFAIP8L3,PRICKLE1,NR K,DDR2,SOCS3,GATA2,ID1,PPP1R1C, XDH,APOA1,FLRT3,LRRC4C,IL17RD, RGS2,DIRAS3,EPHA4 |
| GO: Biological Process | GO:0007167 | enzyme linked receptor protein signaling pathway        | 5,09E-02 | 14 | EPHB2,BMP2,NPPC,DDR2,SOCS3,ID1 ,XDH,ESM1,APOA1,FLRT3,BAIAP2,I L17RD,EPHA4,SMAD9                                  |



**Supplementary Table S3. Molecular enrichment associations analysis on DEG performed with Bioconductor tool.** Significant annotations with q-value  $\leq 0,05$  are shown.

| Category               | ID         | Name                           | q-value  | Hit Count | Hit in Query List                                                                                                                                                                                                                                                                                                                                  |
|------------------------|------------|--------------------------------|----------|-----------|----------------------------------------------------------------------------------------------------------------------------------------------------------------------------------------------------------------------------------------------------------------------------------------------------------------------------------------------------|
| Drug                   | D003907    | Dexamethasone                  | 8,61E-18 | 51        | GALNT15,CA12,KCTD12,CYP1B1,AA<br>DAC,DDIT4,NPPB,PSAT1,NPPC,KRT1<br>4,DHRS3,PDGFRB,PI16,LMCD1,SGK1<br>,ENPP2,SERPINF1,ACTG2,CP,CPE,RG<br>S2,PTGS2,EDN1,TXNIP,BMP2,GJA5,<br>MT2A,TRIB3,MGST1,GCLC,SLC20A1,<br>CD36,ANKRD1,ASNS,KCNK2,PLA2G<br>4A,PLAU,CLEC3B,ATF4,ABCG2,ALD<br>H1A1,MMP1,BMPER,MMP9,MMP16,C<br>X3CL1,IL33,VCAM1,SDPR,ALPK2,CD<br>H13 |
| Drug                   | D010100    | Oxygen                         | 6,51E-17 | 49        | CA12,CYP1B1,DDIT4,NPPB,PSAT1,S<br>YNPO2,NPTX1,DHRS3,PDGFRB,LMC<br>D1,PODXL,SGK1,ANKRD37,ENPP2,S<br>OCS3,ACTG2,CP,TMTC2,CPE,NREP,P<br>TGS2,EDN1,ITIH5,HAPLN1,PPP1R3C,<br>TXNIP,MT2A,KCNE4,MGST1,GCLC,L<br>IPG,CD36,ANKRD1,ASNS,SERPINB2,<br>COL14A1,AK4,PLAU,CLEC3B,ATF4,<br>ABCG2,MMP1,MMP7,MMP9,CX3CL1,<br>EPAS1,VCAM1,CDH13,FRMD3                |
| GO: Biological Process | GO:0072359 | circulatory system development | 1,14E-11 | 35        | CYP1B1,NPPB,NPY2R,RARB,DHRS3,<br>PDGFRB,PI16,SGCD,ENPP2,SERPINF<br>1,SOCS3,SOX17,ID1,ESM1,CPE,ITGA<br>7,PTGS2,EDN1,TBX18,BMP2,GJA5,H<br>HIP,EPHA2,CD36,ANKRD1,KCNK2,A<br>LPK3,COL14A1,PLAU,BMPER,MMP9,<br>CX3CL1,EPAS1,VCAM1,CDH13                                                                                                                 |

|                        |            |                                   |          |    |                                                                                                                                                                                                                        |
|------------------------|------------|-----------------------------------|----------|----|------------------------------------------------------------------------------------------------------------------------------------------------------------------------------------------------------------------------|
| GO: Biological Process | GO:0072358 | cardiovascular system development | 1,14E-11 | 35 | CYP1B1,NPPB,NPY2R,RARB,DHRS3,PDGFRB,PI16,SGCD,ENPP2,SERPINF1,SOCS3,SOX17,ID1,ESM1,CPE,ITGA7,PTGS2,EDN1,TBX18,BMP2,GJA5,HHIP,EPHA2,CD36,ANKRD1,KCNK2,ALPK3,COL14A1,PLAU,BMPER,MMP9,CX3CL1,EPAS1,VCAM1,CDH13             |
| GO: Cellular Component | GO:0005615 | extracellular space               | 1,16E-09 | 37 | CPA4,SERPINA3,NPPB,NPPC,ABI3BP,PI16,LMCD1,PODXL,ENPP2,HLA-DRB5,SERPINF1,ACTG2,CP,SCRG1,CPE,LCP1,EDN1,FGL2,BMP2,SEMA3D,THBD,LIPG,CD36,SERPINB2,C1R,C1S,COL14A1,PLAU,CLEC3B,MMP1,BMPER,MMP7,MMP9,CX3CL1,IL33,VCAM1,CDH13 |
| GO: Biological Process | GO:0001525 | angiogenesis                      | 1,04E-07 | 20 | CYP1B1,NPPB,PDGFRB,ENPP2,SERPINF1,SOX17,ID1,ESM1,PTGS2,EDN1,GJA5,HHIP,EPHA2,CD36,PLAU,BMPER,MMP9,CX3CL1,EPAS1,CDH13                                                                                                    |
| Pathway                | 812256     | TNF signaling pathway             | 1,74E-03 | 8  | TRAF1,SOCS3,PTGS2,EDN1,ATF4,MMP9,CX3CL1,VCAM1                                                                                                                                                                          |
| Pathway                | 576262     | Extracellular matrix organization | 1,74E-03 | 12 | DDR2,ITGA7,HAPLN1,BMP2,ADAMTS18,COL14A1,PCOLCE2,MMP1,MMP7,MMP9,MMP16,VCAM1                                                                                                                                             |
| GO: Cellular Component | GO:0098590 | plasma membrane region            | 2,53E-03 | 20 | KCTD12,DHRS3,PDGFRB,PODXL,ITLN1,DDR2,CPE,LCP1,PTGS2,HHIP,KCNE4,BST2,EPHA2,CD36,KCNK2,ATF4,ABCG2,OSMR,SDPR,CDH13                                                                                                        |

**Supplementary Table S4. Bioconductor molecular enrichment associations analysis on DEI.** Selected annotations illustrated are those showing significant q-value  $\leq 0,003$  from each category.

| <b>Patient characteristics</b> | <b>All</b> | <b>Symptomatic</b> | <b>Asymptomatic</b> |
|--------------------------------|------------|--------------------|---------------------|
| Number, n                      | 11         | 4                  | 7                   |
| Years                          | 68         | 68±8               | 70±12               |
| Sex M/F, n                     | 7/4        | 1/3                | 6/1                 |
| Treatment with statins         | 10         | 3                  | 7                   |
| <b>Risks Factors (%)</b>       |            |                    |                     |
| Diabetes Mellitus              | 6          | 3 (75%)            | 3 (43%)             |
| Dyslipidemia                   | 10         | 4 (100%)           | 6 (86%)             |
| Arterial hypertension          | 9          | 3 (75%)            | 6 (86%)             |
| Tobacco                        | 5          | 3 (75%)            | 2 (29%)             |

**Supplementary Table S5. Demographic data for Basurto University Hospital cohort of additional 11 samples**
